# Supplementary material for: PAC-Mediated AKI Protection Is Critically Mediated but Does Not Exclusively Depend on Cell-Derived Microvesicles
Source: Hindawi journal article supplement (doi:10.1155/2021/8864183), 2021-03-09
Supplement: f1 [file 8864183.f1.pdf]

| Identified Proteins                           | Accession Number | Ratio Angi/Ctro |
|-----------------------------------------------|------------------|-----------------|
| Isoform 2 of IQ calmodulin-binding motif-co   | IQCB1_MOUSE      | 0,00            |
| Fermitin family homolog 3 OS=Mus musculus     | URP2_MOUSE       | 0,00            |
| GTP-binding protein OS=Mus musculus OX=1      | Q61635_MOUSE     | 0,00            |
| Nucleoprotein TPR OS=Mus musculus OX=10       | TPR_MOUSE        | 0,00            |
| Arachidonate 12-lipoxygenase, 12S-type OS=    | LOX12_MOUSE      | 0,00            |
| Isoform 2 of Trem-like transcript 1 protein O | TRML1_MOUSE      | 0,00            |
| Protein kinase C OS=Mus musculus OX=1009      | Q4VA93_MOUSE     | 0,00            |
| Pyrin and HIN domain-containing protein 1 O   | IFIX_MOUSE       | 0,00            |
| EH domain-containing protein 4 OS=Mus mu      | EHD4_MOUSE       | 0,00            |
| Isoform 2 of Phosphatidylinositol 3,4,5-trisp | SHIP1_MOUSE      | 0,00            |
| Calpain-2 catalytic subunit OS=Mus musculus   | CAN2_MOUSE       | 0,00            |
| SWI/SNF-related matrix-associated actin-de    | SMCA5_MOUSE      | 0,00            |
| Platelet factor 4 OS=Mus musculus OX=1009     | PLF4_MOUSE       | 0,00            |
| Ly6g6f protein OS=Mus musculus OX=10090       | B2RXM6_MOUSE     | 0,00            |
| Nuclear mitotic apparatus protein 1 OS=Mus    | NUMA1_MOUSE      | 0,00            |
| CCR4-NOT transcription complex subunit 9 O    | CNOT9_MOUSE      | 0,00            |
| EH domain-containing protein 1 OS=Mus mu      | EHD1_MOUSE       | 0,00            |
| V-type proton ATPase subunit B, brain isofor  | VATB2_MOUSE      | 0,00            |
| Immunoglobulin kappa variable 4-57 (Fragm     | A0A0A6YYE7_MOUSE | 0,00            |
| Septin-7 OS=Mus musculus OX=10090 GN=S        | SEPT7_MOUSE      | 0,00            |
| Isoform 2 of CCR4-NOT transcription comple    | CNOT1_MOUSE      | 0,00            |
| Complement C4-B OS=Mus musculus OX=10         | CO4B_MOUSE       | 0,00            |
| Very-long-chain (3R)-3-hydroxyacyl-CoA dehy   | HACD3_MOUSE      | 0,00            |
| Isoform 2 of Protein PML OS=Mus musculus      | PML_MOUSE        | 0,00            |
| Bifunctional glutamate/proline--tRNA ligase   | SYEP_MOUSE       | 0,00            |
| Ribosome-binding protein 1 OS=Mus musculus    | RRBP1_MOUSE      | 0,00            |
| Bromodomain adjacent to zinc finger domain    | A2AUY4_MOUSE     | 0,00            |
| Copine-1 OS=Mus musculus OX=10090 GN=C        | CPNE1_MOUSE      | 0,00            |
| Tubulin beta-1 chain OS=Mus musculus OX=      | TBB1_MOUSE       | 0,00            |
| Copine-3 OS=Mus musculus OX=10090 GN=C        | CPNE3_MOUSE      | 0,00            |
| T-complex protein 1 subunit epsilon OS=Mus    | TCPE_MOUSE       | 0,00            |
| Isoform 2 of Rootletin OS=Mus musculus OX     | CROCC_MOUSE      | 0,00            |
| Cytoplasmic dynein 1 heavy chain 1 OS=Mus     | DYHC1_MOUSE      | 0,00            |
| Isoform 2 of Tyrosine-protein kinase JAK3 OS  | JAK3_MOUSE       | 0,00            |
| Neutrophil collagenase OS=Mus musculus O      | MMP8_MOUSE       | 0,00            |
| RuvB-like 2 OS=Mus musculus OX=10090 GN       | RUVB2_MOUSE      | 0,00            |
| Branched-chain-amino-acid aminotransferas     | BCAT2_MOUSE      | 0,00            |
| Pleiotropic regulator 1 OS=Mus musculus OX    | PLRG1_MOUSE      | 0,00            |
| Clathrin interactor 1 OS=Mus musculus OX=1    | Q5SUH6_MOUSE     | 0,00            |
| REVERSED Serine/threonine-protein kinase U    | ULK1_MOUSE       | 0,00            |
| Thyroid hormone receptor-associated proteir   | TR150_MOUSE      | 0,00            |
| Protein ABHD11 OS=Mus musculus OX=1009        | ABHDB_MOUSE      | 0,00            |
| REVERSED Titin OS=Mus musculus OX=1009        | TITIN_MOUSE      | 0,00            |
| Isoform HK1 of Hexokinase-1 OS=Mus muscu      | HXK1_MOUSE       | 0,02            |
| Coronin-1A OS=Mus musculus OX=10090 GN        | COR1A_MOUSE      | 0,03            |
| Coagulation factor V OS=Mus musculus OX=      | FA5_MOUSE        | 0,03            |
| Peptidyl-prolyl cis-trans isomerase F, mitoch | PPIF_MOUSE       | 0,06            |

|                                                 |             |      |
|-------------------------------------------------|-------------|------|
| Endonuclease domain-containing 1 protein C      | ENDD1_MOUSE | 0,08 |
| Marginal zone B- and B1-cell-specific protei    | MZB1_MOUSE  | 0,09 |
| Myosin-9 OS=Mus musculus OX=10090 GN=           | MYH9_MOUSE  | 0,10 |
| Isoform 2 of Band 3 anion transport protein C   | B3AT_MOUSE  | 0,10 |
| Multimerin-1 OS=Mus musculus OX=10090 G         | MMRN1_MOUSE | 0,12 |
| Isoform 2 of Tyrosine-protein phosphatase n     | PTN6_MOUSE  | 0,14 |
| Tropomodulin-3 OS=Mus musculus OX=1009          | TMOD3_MOUSE | 0,15 |
| Isoform 2 of Heterogeneous nuclear ribonucl     | HNRPK_MOUSE | 0,15 |
| Malectin OS=Mus musculus OX=10090 GN=N          | MLEC_MOUSE  | 0,15 |
| NADH dehydrogenase [ubiquinone] 1 alpha s       | NDUA8_MOUSE | 0,17 |
| Lamin-B2 OS=Mus musculus OX=10090 GN=           | LMNB2_MOUSE | 0,18 |
| Trafficking protein particle complex subunit 3  | TPPC3_MOUSE | 0,19 |
| Isoform 2 of Programmed cell death protein      | PDCD6_MOUSE | 0,20 |
| Coagulation factor XIII A chain OS=Mus musc     | F13A_MOUSE  | 0,20 |
| Isoform Delta of Lamina-associated polypept     | LAP2B_MOUSE | 0,20 |
| Isoform 2 of MICOS complex subunit Mic60 C      | MIC60_MOUSE | 0,21 |
| Pre-mRNA-processing-splicing factor 8 OS=N      | PRP8_MOUSE  | 0,21 |
| Polypyrimidine tract-binding protein 1 OS=M     | PTBP1_MOUSE | 0,21 |
| Fibrinogen alpha chain OS=Mus musculus OX       | FIBA_MOUSE  | 0,22 |
| Isoform 2 of Calcium/calmodulin-dependent       | KCC2D_MOUSE | 0,23 |
| Protein ERGIC-53 OS=Mus musculus OX=100         | LMAN1_MOUSE | 0,25 |
| Isoform 2 of Heterogeneous nuclear ribonucl     | HNRPU_MOUSE | 0,25 |
| Myosin regulatory light chain 12B OS=Mus m      | ML12B_MOUSE | 0,25 |
| Protein NipSnap homolog 3B OS=Mus muscu         | NPS3B_MOUSE | 0,25 |
| Isoform 2 of Galectin-9 OS=Mus musculus O       | LEG9_MOUSE  | 0,25 |
| Fibrinogen beta chain OS=Mus musculus OX-       | FIBB_MOUSE  | 0,26 |
| Endoplasmic reticulum resident protein 44 O     | ERP44_MOUSE | 0,27 |
| Glia-derived nexin OS=Mus musculus OX=10        | GDN_MOUSE   | 0,27 |
| Talin-1 OS=Mus musculus OX=10090 GN=Tr          | TLN1_MOUSE  | 0,28 |
| Alpha-galactosidase A OS=Mus musculus OX        | AGAL_MOUSE  | 0,29 |
| Metalloproteinase inhibitor 3 OS=Mus muscu      | TIMP3_MOUSE | 0,30 |
| Fibrinogen gamma chain OS=Mus musculus          | FIBG_MOUSE  | 0,31 |
| Coatomer subunit beta' OS=Mus musculus O        | COPB2_MOUSE | 0,31 |
| Isoform CNPI of 2',3'-cyclic-nucleotide 3'-ph   | CN37_MOUSE  | 0,31 |
| Enoyl-CoA delta isomerase 1, mitochondrial      | ECI1_MOUSE  | 0,31 |
| von Willebrand factor OS=Mus musculus OX-       | VWF_MOUSE   | 0,31 |
| NADH dehydrogenase [ubiquinone] flavoprot       | NDUV2_MOUSE | 0,32 |
| Component of Sp100-rs OS=Mus musculus O         | CSPRS_MOUSE | 0,33 |
| Stress-70 protein, mitochondrial OS=Mus mu      | GRP75_MOUSE | 0,33 |
| Trafficking protein particle complex subunit 4  | TPPC4_MOUSE | 0,33 |
| Isoform 2 of Inter alpha-trypsin inhibitor, hea | ITI4_MOUSE  | 0,33 |
| Netrin-3 OS=Mus musculus OX=10090 GN=N          | NET3_MOUSE  | 0,33 |
| Isoform 2 of C-type lectin domain family 1 m    | CLC1B_MOUSE | 0,33 |
| Nucleophosmin OS=Mus musculus OX=10090          | NPM_MOUSE   | 0,33 |
| Gelsolin OS=Mus musculus OX=10090 GN=G          | GELS_MOUSE  | 0,35 |
| Beta-2-microglobulin OS=Mus musculus OX-        | B2MG_MOUSE  | 0,36 |
| Acyl-coenzyme A thioesterase 2, mitochondr      | ACOT2_MOUSE | 0,36 |
| Chitinase-like protein 3 OS=Mus musculus O      | CHIL3_MOUSE | 0,37 |

|                                               |             |      |
|-----------------------------------------------|-------------|------|
| Lamin-B1 OS=Mus musculus OX=10090 GN=         | LMNB1_MOUSE | 0,37 |
| Dolichyl-diphosphooligosaccharide--protein g  | OST48_MOUSE | 0,38 |
| Transforming growth factor beta-1 proprotei   | TGFB1_MOUSE | 0,39 |
| Filamin-A OS=Mus musculus OX=10090 GN=        | FLNA_MOUSE  | 0,40 |
| Isoform SERCA3A of Sarcoplasmic/endoplas      | AT2A3_MOUSE | 0,40 |
| Cleavage and polyadenylation specificity fact | CPSF5_MOUSE | 0,41 |
| 26S proteasome non-ATPase regulatory subu     | PSMD2_MOUSE | 0,42 |
| Fibroblast growth factor 2 OS=Mus musculus    | FGF2_MOUSE  | 0,44 |
| BTB/POZ domain-containing protein KCTD12      | KCD12_MOUSE | 0,44 |
| Complement C3 OS=Mus musculus OX=1009         | CO3_MOUSE   | 0,45 |
| GrpE protein homolog 1, mitochondrial OS=M    | GRPE1_MOUSE | 0,46 |
| Protein SEC13 homolog OS=Mus musculus O       | SEC13_MOUSE | 0,47 |
| Isoform VEGF-1 of Vascular endothelial grow   | VEGFA_MOUSE | 0,47 |
| Actin-related protein 2/3 complex subunit 5   | ARPC5_MOUSE | 0,47 |
| Calpain small subunit 1 OS=Mus musculus O     | CPNS1_MOUSE | 0,50 |
| Isoform 2 of Tenascin-N OS=Mus musculus O     | TENN_MOUSE  | 0,50 |
| Sorbitol dehydrogenase OS=Mus musculus O      | DHSO_MOUSE  | 0,50 |

| Identified Proteins                         | Accession Number | Ratio Angi/Ctro |
|---------------------------------------------|------------------|-----------------|
| Isoform 2 of F-actin-capping protein subu   | CAPZB_MOUSE      | 2,00            |
| Titin OS=Mus musculus OX=10090 GN=Tit       | TITIN_MOUSE      | 2,00            |
| Glucosamine-6-phosphate isomerase 1 O       | GNPI1_MOUSE      | 2,00            |
| Serine (Or cysteine) peptidase inhibitor, c | G3X8T9_MOUSE     | 2,00            |
| Glutamate dehydrogenase 1, mitochondr       | DHE3_MOUSE       | 2,00            |
| Latent-transforming growth factor beta-b    | LTBP2_MOUSE      | 2,00            |
| 40S ribosomal protein S18 OS=Mus muscu      | RS18_MOUSE       | 2,00            |
| Cluster of Isoform 2 of Heterogeneous nu    | HNRPF_MOUSE      | 2,00            |
| Hypoxanthine-guanine phosphoribosyltra      | HPRT_MOUSE       | 2,00            |
| Ubiquitin-conjugating enzyme E2 L3 OS=M     | UB2L3_MOUSE      | 2,00            |
| Vesicle-associated membrane protein-as      | VAPA_MOUSE       | 2,00            |
| Disintegrin and metalloproteinase domai     | ADAM9_MOUSE      | 2,00            |
| Monocyte differentiation antigen CD14 O     | CD14_MOUSE       | 2,00            |
| Rho-related GTP-binding protein RhoC OS     | RHOC_MOUSE       | 2,00            |
| Transcobalamin-2 OS=Mus musculus OX=        | TCO2_MOUSE       | 2,02            |
| Carbonic anhydrase 1 OS=Mus musculus        | CAH1_MOUSE       | 2,03            |
| Carbonic anhydrase 2 OS=Mus musculus        | CAH2_MOUSE       | 2,03            |
| Metalloproteinase inhibitor 1 OS=Mus m      | TIMP1_MOUSE      | 2,07            |
| Glutathione peroxidase 3 OS=Mus muscu       | GPX3_MOUSE       | 2,09            |
| 40S ribosomal protein S4, X isoform OS=M    | RS4X_MOUSE       | 2,13            |
| Ferritin OS=Mus musculus OX=10090 GN=       | Q9CPX4_MOUSE     | 2,14            |
| H-2 class I histocompatibility antigen, K-K | G3UXW2_MOUSE     | 2,14            |
| N(4)-(beta-N-acetylglucosaminyl)-L-aspa     | ASPG_MOUSE       | 2,15            |
| Peroxiredoxin-1 OS=Mus musculus OX=10       | PRDX1_MOUSE      | 2,19            |
| S-formylglutathione hydrolase OS=Mus m      | H3BKH6_MOUSE     | 2,20            |
| Delta(3,5)-Delta(2,4)-dienoyl-CoA isomer    | ECH1_MOUSE       | 2,20            |
| Ferritin heavy chain OS=Mus musculus OX     | FRIH_MOUSE       | 2,21            |
| Cluster of Fibronectin OS=Mus musculus      | A0A087WR50_MOUSE | 2,25            |
| 60S ribosomal protein L12 OS=Mus muscu      | RL12_MOUSE       | 2,25            |
| Cofilin-1 OS=Mus musculus OX=10090 GN       | COF1_MOUSE       | 2,28            |
| Heme oxygenase 1 OS=Mus musculus OX=        | HMOX1_MOUSE      | 2,29            |
| Collagen, type VI, alpha 3 OS=Mus muscu     | E9PWQ3_MOUSE     | 2,32            |
| Proteasome subunit beta type-6 OS=Mus       | PSB6_MOUSE       | 2,33            |
| Isoform 1 of Core histone macro-H2A.1 O     | H2AY_MOUSE       | 2,33            |
| Protein disulfide-isomerase A4 OS=Mus r     | PDIA4_MOUSE      | 2,33            |
| Peptidyl-prolyl cis-trans isomerase A OS=   | PPIA_MOUSE       | 2,34            |
| Syntenin-1 OS=Mus musculus OX=10090         | SDCB1_MOUSE      | 2,38            |
| Vinculin OS=Mus musculus OX=10090 GN        | VINC_MOUSE       | 2,38            |
| Glutaminy-peptide cyclotransferase OS=      | QPCT_MOUSE       | 2,40            |
| Actin-related protein 2 OS=Mus musculus     | ARP2_MOUSE       | 2,40            |
| A disintegrin and metalloproteinase with    | ATS1_MOUSE       | 2,40            |
| Procollagen C-endopeptidase enhancer 1      | PCOC1_MOUSE      | 2,42            |
| Isoform 2 of Adenylate kinase 2, mitoch     | KAD2_MOUSE       | 2,43            |
| ATP synthase subunit beta, mitochondrial    | ATPB_MOUSE       | 2,44            |
| Thioredoxin domain-containing protein 5     | TXND5_MOUSE      | 2,45            |
| Platelet-activating factor acetylhydrolase  | PAFA_MOUSE       | 2,46            |
| Cluster of Thrombospondin-1 OS=Mus m        | Q80YQ1_MOUSE     | 2,46            |

|                                                                      |              |      |
|----------------------------------------------------------------------|--------------|------|
| Malate dehydrogenase, cytoplasmic OS=Mus musculus                    | MDHC_MOUSE   | 2,50 |
| 60S ribosomal protein L17 OS=Mus musculus                            | RL17_MOUSE   | 2,50 |
| Nucleobindin-1 OS=Mus musculus OX=10090                              | NUCB1_MOUSE  | 2,55 |
| Osteopontin OS=Mus musculus OX=10090                                 | OSTP_MOUSE   | 2,59 |
| Proteasome subunit alpha type-4 OS=Mus musculus                      | PSA4_MOUSE   | 2,60 |
| Collagen alpha-1(V) chain OS=Mus musculus                            | CO5A1_MOUSE  | 2,61 |
| Proteasome subunit beta type-3 OS=Mus musculus                       | PSB3_MOUSE   | 2,67 |
| Collagen alpha-2(I) chain OS=Mus musculus                            | CO1A2_MOUSE  | 2,68 |
| Collagen alpha-1(I) chain OS=Mus musculus                            | CO1A1_MOUSE  | 2,68 |
| Cluster of Alpha-enolase OS=Mus musculus                             | ENOA_MOUSE   | 2,70 |
| CD5 antigen-like OS=Mus musculus OX=10090                            | CD5L_MOUSE   | 2,71 |
| Alcohol dehydrogenase [NADP(+)] OS=Mus musculus                      | AK1A1_MOUSE  | 2,71 |
| Protein FAM3C OS=Mus musculus OX=10090                               | FAM3C_MOUSE  | 2,71 |
| Dextrin OS=Mus musculus OX=10090 GN=10090                            | DEST_MOUSE   | 2,71 |
| Beta-glucuronidase OS=Mus musculus OX=10090                          | BGLR_MOUSE   | 2,74 |
| Dipeptidyl peptidase 2 OS=Mus musculus                               | DPP2_MOUSE   | 2,75 |
| Phosphatidylinositol transfer protein alpha OS=Mus musculus          | PIPNA_MOUSE  | 2,75 |
| Granulins OS=Mus musculus OX=10090 GN=10090                          | GRN_MOUSE    | 2,76 |
| Cluster of Elongation factor 1-alpha 1 OS=Mus musculus               | EF1A1_MOUSE  | 2,80 |
| Ras-related protein Rab-11B OS=Mus musculus                          | RB11B_MOUSE  | 2,80 |
| Cluster of Tropomyosin alpha-1 chain OS=Mus musculus                 | TPM1_MOUSE   | 2,85 |
| Peptidyl-prolyl cis-trans isomerase C OS=Mus musculus                | PPIC_MOUSE   | 2,87 |
| Cluster of Glyceraldehyde-3-phosphate dehydrogenase OS=Mus musculus  | G3P_MOUSE    | 2,89 |
| Proteasome subunit alpha type-5 OS=Mus musculus                      | PSA5_MOUSE   | 2,90 |
| Lysosomal alpha-mannosidase OS=Mus musculus                          | MA2B1_MOUSE  | 2,92 |
| SPARC OS=Mus musculus OX=10090 GN=10090                              | SPRC_MOUSE   | 2,96 |
| V-type proton ATPase subunit S1 OS=Mus musculus                      | VAS1_MOUSE   | 3,00 |
| Rab GDP dissociation inhibitor beta OS=Mus musculus                  | GDIB_MOUSE   | 3,00 |
| REVERSED Kinesin-like protein KIF26B OS=Mus musculus                 | KI26B_MOUSE  | 3,00 |
| Chloride intracellular channel protein 1 OS=Mus musculus             | CLIC1_MOUSE  | 3,00 |
| Ras suppressor protein 1 OS=Mus musculus                             | RSU1_MOUSE   | 3,00 |
| Ear6 protein OS=Mus musculus OX=10090                                | Q923L7_MOUSE | 3,00 |
| Protein FAM49B OS=Mus musculus OX=10090                              | FA49B_MOUSE  | 3,00 |
| Stromelysin-1 OS=Mus musculus OX=10090                               | MMP3_MOUSE   | 3,00 |
| Isoform 2 of Stabilin-1 OS=Mus musculus                              | STAB1_MOUSE  | 3,00 |
| Isoform 2 of Vascular endothelial growth factor OS=Mus musculus      | VEGFC_MOUSE  | 3,00 |
| Interleukin-18-binding protein OS=Mus musculus                       | I18BP_MOUSE  | 3,00 |
| Isoform 2 of Hydroxyacylglutathione hydrolase OS=Mus musculus        | GLO2_MOUSE   | 3,00 |
| Carbonyl reductase [NADPH] 1 OS=Mus musculus                         | CBR1_MOUSE   | 3,00 |
| Eukaryotic translation initiation factor 3 subunit 1 OS=Mus musculus | EIF3K_MOUSE  | 3,00 |
| Cluster of Tubulin beta-5 chain OS=Mus musculus                      | TBB5_MOUSE   | 3,05 |
| 14-3-3 protein zeta/delta OS=Mus musculus                            | 1433Z_MOUSE  | 3,05 |
| Palmitoyl-protein thioesterase 1 OS=Mus musculus                     | PPT1_MOUSE   | 3,10 |
| Cluster of 14-3-3 protein gamma OS=Mus musculus                      | 1433G_MOUSE  | 3,16 |
| Aldose reductase OS=Mus musculus OX=10090                            | ALDR_MOUSE   | 3,17 |
| Plasminogen activator inhibitor 1 OS=Mus musculus                    | G5E899_MOUSE | 3,19 |
| Integrin beta-3 OS=Mus musculus OX=10090                             | ITB3_MOUSE   | 3,20 |
| Growth factor receptor-bound protein 2 OS=Mus musculus               | GRB2_MOUSE   | 3,25 |

|                                                                                  |              |      |
|----------------------------------------------------------------------------------|--------------|------|
| Prolactin-2C2 OS=Mus musculus OX=10090                                           | PR2C2_MOUSE  | 3,29 |
| N-acetylglucosamine-6-sulfatase OS=Mus musculus OX=10090                         | GNS_MOUSE    | 3,29 |
| Proprotein convertase subtilisin/kexin type-1 OS=Mus musculus OX=10090           | PCSK9_MOUSE  | 3,33 |
| Proteasome subunit beta type-1 OS=Mus musculus OX=10090                          | PSB1_MOUSE   | 3,38 |
| Cluster of Extracellular matrix protein 1 OX=10090                               | F8WI14_MOUSE | 3,39 |
| Fructose-bisphosphate aldolase A OS=Mus musculus OX=10090                        | ALDOA_MOUSE  | 3,41 |
| Dystroglycan OS=Mus musculus OX=10090                                            | DAG1_MOUSE   | 3,45 |
| Isoform PLEC-1I of Plectin OS=Mus musculus OX=10090                              | PLEC_MOUSE   | 3,50 |
| Isoform 2 of Periostin OS=Mus musculus OX=10090                                  | POSTN_MOUSE  | 3,50 |
| Chloride intracellular channel protein 4 OX=10090                                | CLIC4_MOUSE  | 3,50 |
| Acid sphingomyelinase-like phosphodiesterase 3 OS=Mus musculus OX=10090          | ASM3A_MOUSE  | 3,50 |
| Transgelin-2 OS=Mus musculus OX=10090                                            | TAGL2_MOUSE  | 3,51 |
| Follistatin-related protein 1 OS=Mus musculus OX=10090                           | FSTL1_MOUSE  | 3,61 |
| Nidogen-1 OS=Mus musculus OX=10090                                               | NID1_MOUSE   | 3,64 |
| Lactoylglutathione lyase OS=Mus musculus OX=10090                                | LGUL_MOUSE   | 3,67 |
| Protein-lysine 6-oxidase OS=Mus musculus OX=10090                                | LYOX_MOUSE   | 3,67 |
| Carbonyl reductase [NADPH] 3 OS=Mus musculus OX=10090                            | CBR3_MOUSE   | 3,67 |
| Vimentin OS=Mus musculus OX=10090                                                | VIME_MOUSE   | 3,70 |
| Acid ceramidase OS=Mus musculus OX=10090                                         | ASAH1_MOUSE  | 3,73 |
| Isoform II of Gamma-glutamyl hydrolase OS=Mus musculus OX=10090                  | GGH_MOUSE    | 3,75 |
| Putative phospholipase B-like 2 OS=Mus musculus OX=10090                         | PLBL2_MOUSE  | 3,78 |
| Translationally-controlled tumor protein 1 OS=Mus musculus OX=10090              | TCTP_MOUSE   | 3,88 |
| 40S ribosomal protein SA OS=Mus musculus OX=10090                                | RSSA_MOUSE   | 3,90 |
| Serotransferrin OS=Mus musculus OX=10090                                         | TRFE_MOUSE   | 3,97 |
| Carboxypeptidase E OS=Mus musculus OX=10090                                      | CBPE_MOUSE   | 4,00 |
| Ribonuclease T2-A OS=Mus musculus OX=10090                                       | RNT2A_MOUSE  | 4,00 |
| Proteasome subunit alpha type-7 OS=Mus musculus OX=10090                         | PSA7_MOUSE   | 4,00 |
| Protein/nucleic acid deglycase DJ-1 OS=Mus musculus OX=10090                     | PARK7_MOUSE  | 4,00 |
| Protein CTLA-2-alpha OS=Mus musculus OX=10090                                    | CTL2A_MOUSE  | 4,00 |
| Angiopoietin-related protein 2 OS=Mus musculus OX=10090                          | ANGL2_MOUSE  | 4,00 |
| Pro-cathepsin H OS=Mus musculus OX=10090                                         | CATH_MOUSE   | 4,00 |
| 60S ribosomal protein L6 OS=Mus musculus OX=10090                                | RL6_MOUSE    | 4,00 |
| Desmin OS=Mus musculus OX=10090                                                  | DESM_MOUSE   | 4,00 |
| COP9 signalosome complex subunit 8 OS=Mus musculus OX=10090                      | CSN8_MOUSE   | 4,00 |
| [Protein ADP-ribosylarginine] hydrolase OS=Mus musculus OX=10090                 | ADPRH_MOUSE  | 4,00 |
| Transcriptional activator protein Pur-alpha OS=Mus musculus OX=10090             | PURA_MOUSE   | 4,00 |
| 14-3-3 protein eta OS=Mus musculus OX=10090                                      | 1433F_MOUSE  | 4,04 |
| Cluster of Insulin-like growth factor-binding protein 7 OS=Mus musculus OX=10090 | IBP7_MOUSE   | 4,05 |
| Glutathione S-transferase P 1 OS=Mus musculus OX=10090                           | GSTP1_MOUSE  | 4,14 |
| Tubulointerstitial nephritis antigen-like OX=10090                               | TINAL_MOUSE  | 4,17 |
| Biglycan OS=Mus musculus OX=10090                                                | PGS1_MOUSE   | 4,18 |
| Annexin A1 OS=Mus musculus OX=10090                                              | ANXA1_MOUSE  | 4,21 |
| Leukocyte elastase inhibitor A OS=Mus musculus OX=10090                          | ILEUA_MOUSE  | 4,25 |
| Cofilin-2 OS=Mus musculus OX=10090                                               | COF2_MOUSE   | 4,25 |
| 14-3-3 protein epsilon OS=Mus musculus OX=10090                                  | 1433E_MOUSE  | 4,26 |
| Transgelin OS=Mus musculus OX=10090                                              | TAGL_MOUSE   | 4,29 |
| Cluster of Heat shock protein HSP 90-beta OS=Mus musculus OX=10090               | HS90B_MOUSE  | 4,33 |
| 6-phosphogluconolactonase OS=Mus musculus OX=10090                               | 6PGL_MOUSE   | 4,33 |



|                                            |              |      |
|--------------------------------------------|--------------|------|
| Secreted frizzled-related protein 2 OS=M   | SFRP2_MOUSE  | 4,33 |
| N-acetylgalactosamine-6-sulfatase OS=M     | GALNS_MOUSE  | 4,33 |
| Isoform 2 of Neutral alpha-glucosidase A   | GANAB_MOUSE  | 4,33 |
| Rho GDP-dissociation inhibitor 1 OS=Mus    | GDIR1_MOUSE  | 4,43 |
| Bisphosphoglycerate mutase OS=Mus mu       | PMGE_MOUSE   | 4,43 |
| C-C motif chemokine 2 OS=Mus musculus      | CCL2_MOUSE   | 4,50 |
| Glucose-6-phosphate isomerase OS=Mus       | G6PI_MOUSE   | 4,50 |
| Biliverdin reductase A OS=Mus musculus     | BIEA_MOUSE   | 4,50 |
| Proteasome subunit beta type-4 OS=Mus      | PSB4_MOUSE   | 4,50 |
| Cathepsin O OS=Mus musculus OX=10090       | CATO_MOUSE   | 4,50 |
| Moesin OS=Mus musculus OX=10090 GN         | MOES_MOUSE   | 4,57 |
| Alpha-N-acetylglucosaminidase OS=Mus       | O88325_MOUSE | 4,67 |
| Insulin-like growth factor-binding protein | IBP4_MOUSE   | 4,67 |
| Procollagen-lysine,2-oxoglutarate 5-dioxy  | PLOD1_MOUSE  | 4,71 |
| Isoform 2 of Fibulin-2 OS=Mus musculus     | FBLN2_MOUSE  | 4,80 |
| Cluster of Pyruvate kinase PKM OS=Mus r    | KPYM_MOUSE   | 4,86 |
| Isoform 2 of 14-3-3 protein theta OS=Mus   | 1433T_MOUSE  | 5,00 |
| Integrin alpha-5 OS=Mus musculus OX=10     | ITA5_MOUSE   | 5,00 |
| Cluster of Ubiquitin-conjugating enzyme    | UB2V1_MOUSE  | 5,00 |
| Glutathione S-transferase A4 OS=Mus m      | GSTA4_MOUSE  | 5,00 |
| Lysyl oxidase homolog 2 OS=Mus muscul      | LOXL2_MOUSE  | 5,00 |
| Isoform Alpha-6X1A of Integrin alpha-6 O   | ITA6_MOUSE   | 5,00 |
| Cluster of Caldesmon 1 OS=Mus musculu      | E9QA16_MOUSE | 5,00 |
| Serpin H1 OS=Mus musculus OX=10090 G       | SERPH_MOUSE  | 5,05 |
| Isoform 2 of Sorbin and SH3 domain-cont    | SRBS2_MOUSE  | 5,25 |
| Phosphoglycerate kinase 1 OS=Mus musc      | PGK1_MOUSE   | 5,27 |
| Peroxiredoxin-6 OS=Mus musculus OX=10      | PRDX6_MOUSE  | 5,32 |
| Galectin-3-binding protein OS=Mus musc     | LG3BP_MOUSE  | 5,33 |
| Phosphatidylethanolamine-binding protei    | PEBP1_MOUSE  | 5,33 |
| Actin-related protein 2/3 complex subuni   | ARC1B_MOUSE  | 5,33 |
| Cluster of Collagen alpha-1(XVIII) chain O | COIA1_MOUSE  | 5,47 |
| Ribosomal protein OS=Mus musculus OX=      | Q5XJF6_MOUSE | 5,50 |
| Follistatin-related protein 3 OS=Mus mus   | FSTL3_MOUSE  | 5,50 |
| Proteasome subunit alpha type-1 OS=Mus     | PSA1_MOUSE   | 5,83 |
| Cluster of Alpha-actinin-4 OS=Mus muscu    | ACTN4_MOUSE  | 5,89 |
| Proteasome subunit beta type-5 OS=Mus      | PSB5_MOUSE   | 6,00 |
| Integrin beta-1 OS=Mus musculus OX=10      | ITB1_MOUSE   | 6,00 |
| Elongation factor 1-beta OS=Mus muscul     | EF1B_MOUSE   | 6,00 |
| Phospholipase B-like 1 OS=Mus musculus     | PLBL1_MOUSE  | 6,00 |
| Isoform 2 of Septin-11 OS=Mus musculus     | SEP11_MOUSE  | 6,00 |
| Tripeptidyl-peptidase 1 OS=Mus musculu     | TPP1_MOUSE   | 6,22 |
| Serpin B6 OS=Mus musculus OX=10090 G       | SPB6_MOUSE   | 6,29 |
| Elongation factor 1-gamma OS=Mus mus       | EF1G_MOUSE   | 6,29 |
| 6-phosphogluconate dehydrogenase, deca     | 6PGD_MOUSE   | 6,40 |
| Phosphatidylinositol transfer protein beta | PIPNB_MOUSE  | 6,50 |
| Amyloid-beta A4 protein OS=Mus muscul      | A4_MOUSE     | 6,60 |
| Annexin A5 OS=Mus musculus OX=10090        | ANXA5_MOUSE  | 6,60 |
| Synaptic vesicle membrane protein VAT-1    | VAT1_MOUSE   | 6,88 |

|                                            |              |       |
|--------------------------------------------|--------------|-------|
| Annexin A2 OS=Mus musculus OX=10090        | ANXA2_MOUSE  | 6,88  |
| Proteasome subunit alpha type-6 OS=Mus     | PSA6_MOUSE   | 7,00  |
| Proteasome subunit beta type-2 OS=Mus      | PSB2_MOUSE   | 7,00  |
| Beta-1,3-N-acetylglucosaminyltransferase   | LFNG_MOUSE   | 7,00  |
| Fibulin-1 OS=Mus musculus OX=10090         | FBLN1_MOUSE  | 7,00  |
| 72 kDa type IV collagenase OS=Mus musc     | MMP2_MOUSE   | 7,20  |
| Phospholipase D3 OS=Mus musculus OX=       | PLD3_MOUSE   | 7,33  |
| Retinoid-inducible serine carboxypeptidase | RISC_MOUSE   | 7,33  |
| Transketolase OS=Mus musculus OX=100       | TKT_MOUSE    | 7,60  |
| Neuronal pentraxin-1 OS=Mus musculus       | NPTX1_MOUSE  | 8,00  |
| Endothelial protein C receptor OS=Mus m    | EPCR_MOUSE   | 8,00  |
| Cadherin-11 OS=Mus musculus OX=10090       | CAD11_MOUSE  | 8,00  |
| Fibrillin-1 OS=Mus musculus OX=10090       | FBN1_MOUSE   | 8,50  |
| Clusterin OS=Mus musculus OX=10090         | CLUS_MOUSE   | 8,61  |
| Connective tissue growth factor OS=Mus     | CTGF_MOUSE   | 8,89  |
| Inactive tyrosine-protein kinase 7 OS=Mus  | PTK7_MOUSE   | 9,00  |
| C-X-C motif chemokine 16 OS=Mus musc       | CXL16_MOUSE  | 9,00  |
| Cluster of Heat shock 70 kDa protein 4 OS  | HSP74_MOUSE  | 10,00 |
| Twinfilin-1 OS=Mus musculus OX=10090       | TWF1_MOUSE   | 10,00 |
| Mammalian ependymin-related protein 1      | EPDR1_MOUSE  | 10,00 |
| Nuclease-sensitive element-binding protei  | YBOX1_MOUSE  | 10,00 |
| AHNAK nucleoprotein (desmoyokin) OS=N      | E9Q616_MOUSE | 10,00 |
| Isoform 2 of Heterogeneous nuclear ribon   | HNRPD_MOUSE  | 10,00 |
| Isoform 2 of Tenascin OS=Mus musculus      | TENA_MOUSE   | 10,20 |
| Protein CYR61 OS=Mus musculus OX=100       | CYR61_MOUSE  | 10,20 |
| Collagen alpha-2(IV) chain OS=Mus musc     | CO4A2_MOUSE  | 10,30 |
| Testin-2 OS=Mus musculus OX=10090          | TEST2_MOUSE  | 10,50 |
| Glutathione S-transferase omega-1 OS=N     | GSTO1_MOUSE  | 10,50 |
| Basement membrane-specific heparan su      | E9PZ16_MOUSE | 10,52 |
| Poly(rC)-binding protein 1 OS=Mus muscu    | PCBP1_MOUSE  | 10,67 |
| Isocitrate dehydrogenase [NADP] cytoplas   | IDHC_MOUSE   | 11,00 |
| 40S ribosomal protein S3 OS=Mus muscu      | RS3_MOUSE    | 11,00 |
| Carboxypeptidase Q OS=Mus musculus O       | CBPQ_MOUSE   | 11,00 |
| Isoform 2 of Proliferation-associated prot | PA2G4_MOUSE  | 11,00 |
| Bone morphogenetic protein 1 OS=Mus m      | BMP1_MOUSE   | 11,25 |
| Cluster of Glutathione S-transferase Mu    | GSTM1_MOUSE  | 11,75 |
| WD repeat-containing protein 1 OS=Mus      | WDR1_MOUSE   | 12,00 |
| Isoform LAMP-2B of Lysosome-associated     | LAMP2_MOUSE  | 12,00 |
| Dihydropteridine reductase OS=Mus musc     | DHPR_MOUSE   | 12,00 |
| PDZ and LIM domain protein 5 OS=Mus m      | PDLI5_MOUSE  | 12,50 |
| Isoform 2 of Disintegrin and metalloprote  | ADA15_MOUSE  | 13,00 |
| Prolow-density lipoprotein receptor-relat  | LRP1_MOUSE   | 14,00 |
| 60S ribosomal protein L5 OS=Mus muscu      | RL5_MOUSE    | 14,00 |
| Isoform Mt-VDAC1 of Voltage-dependent      | VDAC1_MOUSE  | 14,00 |
| Mannosyl-oligosaccharide 1,2-alpha-man     | MA1A1_MOUSE  | 14,00 |
| Phospholipid transfer protein OS=Mus m     | PLTP_MOUSE   | 14,50 |
| Cysteine and glycine-rich protein 1 OS=M   | CSRP1_MOUSE  | 14,50 |
| Ras-related C3 botulinum toxin substrate   | RAC1_MOUSE   | 14,50 |



|                                                                 |              |               |
|-----------------------------------------------------------------|--------------|---------------|
| Aspartate aminotransferase, cytoplasmic                         | AATC_MOUSE   | 15,00         |
| ATP synthase subunit O, mitochondrial OS=Mus                    | ATPO_MOUSE   | 15,00         |
| Proteasome subunit beta type-8 OS=Mus                           | PSB8_MOUSE   | 16,00         |
| Collagen alpha-1(IV) chain OS=Mus muscu                         | CO4A1_MOUSE  | 16,25         |
| Angiopoietin-1 OS=Mus musculus OX=10090 GN=                     | ANGP1_MOUSE  | 17,47         |
| Receptor of activated protein C kinase 1 OS=Mus                 | RACK1_MOUSE  | 17,50         |
| Ribonuclease inhibitor OS=Mus musculus                          | RINI_MOUSE   | 18,00         |
| Thioredoxin-like protein 1 OS=Mus muscu                         | TXNL1_MOUSE  | 18,00         |
| Collagen alpha-1(VI) chain OS=Mus muscu                         | CO6A1_MOUSE  | 18,50         |
| Insulin-like growth factor-binding protein                      | IBP3_MOUSE   | 19,00         |
| Elongation factor 2 OS=Mus musculus OX=10090 GN=                | EF2_MOUSE    | 19,33         |
| Dihydropyrimidinase-related protein 2 OS=Mus                    | DPYL2_MOUSE  | 20,00         |
| Epididymis-specific alpha-mannosidase OS=Mus                    | MA2B2_MOUSE  | 21,00         |
| Isoform 2 of Sulphydryl oxidase 1 OS=Mus                        | QSOX1_MOUSE  | 21,33         |
| Adipocyte enhancer-binding protein 1 OS=Mus                     | AEBP1_MOUSE  | 28,50         |
| Collagen alpha-2(V) chain OS=Mus muscu                          | CO5A2_MOUSE  | 30,00         |
| Peroxidasin homolog OS=Mus musculus OX=10090 GN=                | PXDN_MOUSE   | 59,50         |
| Fascin OS=Mus musculus OX=10090 GN=                             | FSCN1_MOUSE  | 67,00         |
| Cadherin-5 OS=Mus musculus OX=10090 GN=                         | CADH5_MOUSE  | 141,00        |
| Angiopoietin-2 OS=Mus musculus OX=10090 GN=                     | ANGP2_MOUSE  | only in AngII |
| Filamin-B OS=Mus musculus OX=10090 GN=                          | FLNB_MOUSE   | only in AngII |
| Endothelial cell-specific molecule 1 OS=Mus                     | ESM1_MOUSE   | only in AngII |
| Myosin light chain 3 OS=Mus musculus OX=10090 GN=               | MYL3_MOUSE   | only in AngII |
| Vascular cell adhesion protein 1 OS=Mus                         | VCAM1_MOUSE  | only in AngII |
| Isoform 2 of Cell surface glycoprotein MUC18 OS=Mus             | MUC18_MOUSE  | only in AngII |
| Beta-galactosidase OS=Mus musculus OX=10090 GN=                 | BGAL_MOUSE   | only in AngII |
| Myosin regulatory light chain 2, ventricular OS=Mus             | MLRV_MOUSE   | only in AngII |
| Isoform 2 of Lactadherin OS=Mus musculus OX=10090 GN=           | MFGM_MOUSE   | only in AngII |
| Complement component C1q receptor OS=Mus                        | C1QR1_MOUSE  | only in AngII |
| Transitional endoplasmic reticulum ATPase OS=Mus                | TERA_MOUSE   | only in AngII |
| 60S acidic ribosomal protein P0 OS=Mus                          | RLA0_MOUSE   | only in AngII |
| Coiled-coil domain-containing protein 80 OS=Mus                 | CCD80_MOUSE  | only in AngII |
| Tyrosine-protein kinase receptor Tie-1 OS=Mus                   | TIE1_MOUSE   | only in AngII |
| Dihydropyrimidinase-related protein 3 OS=Mus                    | E9PWE8_MOUSE | only in AngII |
| Fibulin-5 OS=Mus musculus OX=10090 GN=                          | FBLN5_MOUSE  | only in AngII |
| Isoform 2 of Calsyntenin-1 OS=Mus muscu                         | CSTN1_MOUSE  | only in AngII |
| Phosphoserine aminotransferase OS=Mus                           | SERC_MOUSE   | only in AngII |
| Semaphorin-7A OS=Mus musculus OX=10090 GN=                      | SEM7A_MOUSE  | only in AngII |
| Plasmalemma vesicle-associated protein OS=Mus                   | PLVAP_MOUSE  | only in AngII |
| Complement C1s-A subcomponent OS=Mus                            | CS1A_MOUSE   | only in AngII |
| Calcium-activated chloride channel regulator 1 OS=Mus           | CA3A1_MOUSE  | only in AngII |
| Isoform 2 of Platelet endothelial cell adhesion molecule OS=Mus | PECA1_MOUSE  | only in AngII |
| Vitamin K-dependent protein S OS=Mus                            | PROS_MOUSE   | only in AngII |
| 40S ribosomal protein S5 (Fragment) OS=Mus                      | D3YYM6_MOUSE | only in AngII |
| Cluster of H-2 class I histocompatibility antigen OS=Mus        | HA11_MOUSE   | only in AngII |
| 60S ribosomal protein L7 OS=Mus muscu                           | RL7_MOUSE    | only in AngII |
| 40S ribosomal protein S3a OS=Mus muscu                          | RS3A_MOUSE   | only in AngII |
| Nidogen-2 OS=Mus musculus OX=10090 GN=                          | NID2_MOUSE   | only in AngII |

|                                                                            |                  |               |
|----------------------------------------------------------------------------|------------------|---------------|
| Aconitate hydratase, mitochondrial OS=Mus musculus                         | ACON_MOUSE       | only in AngII |
| Isoform A3B of Troponin T, cardiac muscle OS=Mus musculus                  | TNNT2_MOUSE      | only in AngII |
| Aldose reductase-related protein 2 OS=Mus musculus                         | ALD2_MOUSE       | only in AngII |
| Laminin subunit alpha-4 OS=Mus musculus                                    | LAMA4_MOUSE      | only in AngII |
| 40S ribosomal protein S2 OS=Mus musculus                                   | RS2_MOUSE        | only in AngII |
| Isoform 3 of Programmed cell death 6-interacting protein 1 OS=Mus musculus | PDC6I_MOUSE      | only in AngII |
| NK13 OS=Mus musculus OX=10090 GN=SI                                        | O08804_MOUSE     | only in AngII |
| Glypican-4 OS=Mus musculus OX=10090 GN=SI                                  | GPC4_MOUSE       | only in AngII |
| Myoglobin OS=Mus musculus OX=10090 GN=SI                                   | MYG_MOUSE        | only in AngII |
| Arylsulfatase A OS=Mus musculus OX=10090 GN=SI                             | ARSA_MOUSE       | only in AngII |
| Proteasome subunit beta type-7 OS=Mus musculus                             | PSB7_MOUSE       | only in AngII |
| Troponin I, cardiac muscle OS=Mus musculus                                 | TNNI3_MOUSE      | only in AngII |
| Macrophage colony-stimulating factor 1 OS=Mus musculus                     | CSF1_MOUSE       | only in AngII |
| Collagen alpha-1(XV) chain OS=Mus musculus                                 | COFA1_MOUSE      | only in AngII |
| Lysyl oxidase homolog 3 OS=Mus musculus                                    | LOXL3_MOUSE      | only in AngII |
| Decorin OS=Mus musculus OX=10090 GN=SI                                     | PGS2_MOUSE       | only in AngII |
| Spermidine synthase OS=Mus musculus                                        | SPEE_MOUSE       | only in AngII |
| Laminin subunit gamma-1 OS=Mus musculus                                    | F8VQJ3_MOUSE     | only in AngII |
| Ras-related protein Rab-7a OS=Mus musculus                                 | RAB7A_MOUSE      | only in AngII |
| Adenosylhomocysteinase OS=Mus musculus                                     | SAHH_MOUSE       | only in AngII |
| Coronin-1C OS=Mus musculus OX=10090 GN=SI                                  | COR1C_MOUSE      | only in AngII |
| Trifunctional enzyme subunit alpha, mitochondrial OS=Mus musculus          | ECHA_MOUSE       | only in AngII |
| Low-density lipoprotein receptor OS=Mus musculus                           | LDLR_MOUSE       | only in AngII |
| GTP-binding nuclear protein Ran OS=Mus musculus                            | RAN_MOUSE        | only in AngII |
| Selenoprotein P OS=Mus musculus OX=10090 GN=SI                             | SEPP1_MOUSE      | only in AngII |
| Isoform 2 of Heterogeneous nuclear ribonucleoprotein A2 OS=Mus musculus    | ROA2_MOUSE       | only in AngII |
| Calumenin OS=Mus musculus OX=10090 GN=SI                                   | CALU_MOUSE       | only in AngII |
| UMP-CMP kinase OS=Mus musculus OX=10090 GN=SI                              | KCY_MOUSE        | only in AngII |
| Heterogeneous nuclear ribonucleoprotein A2 OS=Mus musculus                 | ROAA_MOUSE       | only in AngII |
| 40S ribosomal protein S8 OS=Mus musculus                                   | RS8_MOUSE        | only in AngII |
| Electron transfer flavoprotein subunit alpha OS=Mus musculus               | ETFSA_MOUSE      | only in AngII |
| Electron transfer flavoprotein subunit beta OS=Mus musculus                | ETFSB_MOUSE      | only in AngII |
| Plasma protease C1 inhibitor OS=Mus musculus                               | IC1_MOUSE        | only in AngII |
| Laminin subunit beta-1 OS=Mus musculus                                     | LAMB1_MOUSE      | only in AngII |
| Lysyl oxidase homolog 1 OS=Mus musculus                                    | LOXL1_MOUSE      | only in AngII |
| Cluster of Myosin-binding protein C, cardiac type OS=Mus musculus          | E9Q9T8_MOUSE     | only in AngII |
| Creatine kinase M-type OS=Mus musculus                                     | KCRM_MOUSE       | only in AngII |
| Sepiapterin reductase OS=Mus musculus                                      | SPRE_MOUSE       | only in AngII |
| Beta-mannosidase OS=Mus musculus OX=10090 GN=SI                            | A0A0R4J092_MOUSE | only in AngII |
| Eukaryotic initiation factor 4A-I OS=Mus musculus                          | IF4A1_MOUSE      | only in AngII |
| 60S ribosomal protein L18 OS=Mus musculus                                  | RL18_MOUSE       | only in AngII |
| T-complex protein 1 subunit eta OS=Mus musculus                            | TCPH_MOUSE       | only in AngII |
| 3-ketoacyl-CoA thiolase, mitochondrial OS=Mus musculus                     | THIM_MOUSE       | only in AngII |
| Angiotensin-converting enzyme OS=Mus musculus                              | ACE_MOUSE        | only in AngII |
| Isoform Beta of Tissue factor pathway inhibitor 1 OS=Mus musculus          | TFPI1_MOUSE      | only in AngII |
| Ceroid-lipofuscinosis neuronal protein 5 homolog OS=Mus musculus           | CLN5_MOUSE       | only in AngII |
| Cytochrome c oxidase subunit 5A, mitochondrial OS=Mus musculus             | COX5A_MOUSE      | only in AngII |
| Microtubule-associated protein RP/EB family class 1A OS=Mus musculus       | MARE1_MOUSE      | only in AngII |

|                                                                    |              |               |
|--------------------------------------------------------------------|--------------|---------------|
| Isoform Cytoplasmic+peroxisomal of Peroxisomal Dipeptidase 1       | PRDX5_MOUSE  | only in AngII |
| Peptidyl-prolyl cis-trans isomerase FKBP1                          | FKBP10_MOUSE | only in AngII |
| Serine protease HTRA1 OS=Mus musculus                              | HTRA1_MOUSE  | only in AngII |
| NAD(P) transhydrogenase, mitochondrial                             | NNTM_MOUSE   | only in AngII |
| Proteasome activator complex subunit 1                             | PSME1_MOUSE  | only in AngII |
| 60S ribosomal protein L14 OS=Mus musculus                          | RL14_MOUSE   | only in AngII |
| 60S ribosomal protein L7a OS=Mus musculus                          | RL7A_MOUSE   | only in AngII |
| Isoform 2 of AP-2 complex subunit beta                             | AP2B1_MOUSE  | only in AngII |
| Ephrin-A1 OS=Mus musculus OX=10090                                 | EFNA1_MOUSE  | only in AngII |
| Macrophage colony-stimulating factor 1 receptor                    | CSF1R_MOUSE  | only in AngII |
| 60S ribosomal protein L18a OS=Mus musculus                         | RL18A_MOUSE  | only in AngII |
| Ubiquitin carboxyl-terminal hydrolase isoform 1                    | UCHL1_MOUSE  | only in AngII |
| Zyxin OS=Mus musculus OX=10090 GN=Z                                | ZYX_MOUSE    | only in AngII |
| Isoform A0 of Neuropilin-2 OS=Mus musculus                         | NRP2_MOUSE   | only in AngII |
| Isoform 2 of Cytosol aminopeptidase OS=Mus musculus                | AMPL_MOUSE   | only in AngII |
| Isoform 2 of Vacuolar protein sorting-associated protein 29        | VPS29_MOUSE  | only in AngII |
| 60S ribosomal protein L9 OS=Mus musculus                           | RL9_MOUSE    | only in AngII |
| ATP synthase subunit delta, mitochondrial                          | ATPD_MOUSE   | only in AngII |
| Glutathione peroxidase 1 OS=Mus musculus                           | GPX1_MOUSE   | only in AngII |
| Inhibin beta A chain OS=Mus musculus OX=10090                      | INHBA_MOUSE  | only in AngII |
| Osteoclast-stimulating factor 1 OS=Mus musculus                    | OSTF1_MOUSE  | only in AngII |
| 60S ribosomal protein L13 OS=Mus musculus                          | RL13_MOUSE   | only in AngII |
| Acetyl-CoA acetyltransferase, mitochondrial                        | THIL_MOUSE   | only in AngII |
| Ubiquitin-conjugating enzyme E2 K OS=Mus musculus                  | UBE2K_MOUSE  | only in AngII |
| Synaptobrevin homolog YKT6 OS=Mus musculus                         | YKT6_MOUSE   | only in AngII |
| Lymphocyte antigen 86 OS=Mus musculus                              | LY86_MOUSE   | only in AngII |
| Tyrosine-protein kinase Mer OS=Mus musculus                        | MERTK_MOUSE  | only in AngII |
| Olfactomedin-like protein 2B OS=Mus musculus                       | OLM2B_MOUSE  | only in AngII |
| 40S ribosomal protein S7 OS=Mus musculus                           | RS7_MOUSE    | only in AngII |
| T-complex protein 1 subunit zeta OS=Mus musculus                   | TCPZ_MOUSE   | only in AngII |
| Ubiquitin-like modifier-activating enzyme 1                        | UBA1_MOUSE   | only in AngII |
| Isoform 2 of Matrilin-2 OS=Mus musculus                            | MATN2_MOUSE  | only in AngII |
| Isoform 2 of Bone morphogenetic protein 5                          | BMP5_MOUSE   | only in AngII |
| Major prion protein OS=Mus musculus OX=10090                       | PRIO_MOUSE   | only in AngII |
| Vascular endothelial growth factor receptor 1                      | VGFR1_MOUSE  | only in AngII |
| Cluster of Isoform 2 of Microtubule-associated protein 4           | MAP4_MOUSE   | only in AngII |
| Fatty acid synthase OS=Mus musculus OX=10090                       | FAS_MOUSE    | only in AngII |
| Farnesyl pyrophosphate synthase OS=Mus musculus                    | FPPS_MOUSE   | only in AngII |
| Isopentenyl-diphosphate Delta-isomerase 1                          | IDI1_MOUSE   | only in AngII |
| Integrin beta-2 OS=Mus musculus OX=10090                           | ITB2_MOUSE   | only in AngII |
| Platelet-activating factor acetylhydrolase 1B                      | PA1B2_MOUSE  | only in AngII |
| Proteasome activator complex subunit 2                             | PSME2_MOUSE  | only in AngII |
| Cytochrome b-c1 complex subunit 2, mitochondrial                   | QCR2_MOUSE   | only in AngII |
| Isoform 2 of 4F2 cell-surface antigen heparin sulfate proteoglycan | 4F2_MOUSE    | only in AngII |
| Isoform 2 of Thioredoxin reductase 1, cytosolic                    | TRXR1_MOUSE  | only in AngII |
| 26S proteasome non-ATPase regulatory subunit 13                    | PSD13_MOUSE  | only in AngII |
| Isoform 2 of Multimerin-2 OS=Mus musculus                          | MMRN2_MOUSE  | only in AngII |
| Four and a half LIM domains protein 3 OS=Mus musculus              | FHL3_MOUSE   | only in AngII |

|                                            |             |               |
|--------------------------------------------|-------------|---------------|
| Myristoylated alanine-rich C-kinase subst  | MARCS_MOUSE | only in AngII |
| Voltage-dependent anion-selective chann    | VDAC2_MOUSE | only in AngII |
| Plexin domain-containing protein 2 OS=M    | PXDC2_MOUSE | only in AngII |
| Cluster of ADP/ATP translocase 1 OS=Mus    | ADT1_MOUSE  | only in AngII |
| ATP synthase subunit d, mitochondrial OS   | ATP5H_MOUSE | only in AngII |
| Coatomer subunit delta OS=Mus musc         | COPD_MOUSE  | only in AngII |
| Mannose-1-phosphate guanyltransferase      | GMPPB_MOUSE | only in AngII |
| L-lactate dehydrogenase B chain OS=Mus     | LDHB_MOUSE  | only in AngII |
| Multiple epidermal growth factor-like do   | MEG10_MOUSE | only in AngII |
| Peroxiredoxin-4 OS=Mus musculus OX=10      | PRDX4_MOUSE | only in AngII |
| Cytochrome b-c1 complex subunit 1, mito    | QCR1_MOUSE  | only in AngII |
| Alpha-soluble NSF attachment protein OS    | SNAA_MOUSE  | only in AngII |
| Syntaxin-7 OS=Mus musculus OX=10090        | STX7_MOUSE  | only in AngII |
| Vasorin OS=Mus musculus OX=10090 GN        | VASN_MOUSE  | only in AngII |
| PDZ and LIM domain protein 7 OS=Mus m      | PDLI7_MOUSE | only in AngII |
| 3'(2'),5'-bisphosphate nucleotidase 1 OS=  | BPNT1_MOUSE | only in AngII |
| Collagen alpha-2(VI) chain OS=Mus musc     | CO6A2_MOUSE | only in AngII |
| Protein FAM198B OS=Mus musculus OX=        | F198B_MOUSE | only in AngII |
| Inosine triphosphate pyrophosphatase OS    | ITPA_MOUSE  | only in AngII |
| Pyridoxal phosphate homeostasis protein    | PLPHP_MOUSE | only in AngII |
| 60S ribosomal protein L13a OS=Mus mus      | RL13A_MOUSE | only in AngII |
| Citrate synthase, mitochondrial OS=Mus     | CISY_MOUSE  | only in AngII |
| Ubiquitin-fold modifier-conjugating enzyr  | UFC1_MOUSE  | only in AngII |
| Collectin-12 OS=Mus musculus OX=10090      | COL12_MOUSE | only in AngII |
| Cytochrome c oxidase subunit 4 isoform 1   | COX41_MOUSE | only in AngII |
| Heat shock 70 kDa protein 13 OS=Mus m      | HSP13_MOUSE | only in AngII |
| Gamma-aminobutyric acid receptor-asso      | GBRAP_MOUSE | only in AngII |
| Isocitrate dehydrogenase [NADP], mitoch    | IDHP_MOUSE  | only in AngII |
| Inhibin beta B chain OS=Mus musculus O     | INHBB_MOUSE | only in AngII |
| Macrophage mannose receptor 1 OS=Mus       | MRC1_MOUSE  | only in AngII |
| S-methyl-5'-thioadenosine phosphorylase    | MTAP_MOUSE  | only in AngII |
| Serine/threonine-protein phosphatase 2A    | PTPA_MOUSE  | only in AngII |
| UV excision repair protein RAD23 homolog   | RD23B_MOUSE | only in AngII |
| Isoform 2 of Neural cell adhesion molecu   | NCAM1_MOUSE | only in AngII |
| Isoform 2 of Amyloid-like protein 2 OS=M   | APLP2_MOUSE | only in AngII |
| LIM and SH3 domain protein 1 OS=Mus m      | LASP1_MOUSE | only in AngII |
| Isoform 2 of Cellular nucleic acid-binding | CNBP_MOUSE  | only in AngII |
| Serine protease 23 OS=Mus musculus OX      | PRS23_MOUSE | only in AngII |
| UPF0764 protein C16orf89 homolog OS=M      | CP089_MOUSE | only in AngII |
| Semaphorin-3A OS=Mus musculus OX=10        | SEM3A_MOUSE | only in AngII |
| Creatine kinase B-type OS=Mus musculus     | KCRB_MOUSE  | only in AngII |
| Beta-1,4-galactosyltransferase 5 OS=Mus    | B4GT5_MOUSE | only in AngII |
| Calcium-binding protein 39 OS=Mus musc     | CAB39_MOUSE | only in AngII |
| Transforming growth factor beta-2 prope    | TGFB2_MOUSE | only in AngII |
| Calcium-regulated heat stable protein 1    | CHSP1_MOUSE | only in AngII |
| Latexin OS=Mus musculus OX=10090 GN        | LXN_MOUSE   | only in AngII |
| 26S proteasome non-ATPase regulatory s     | PSD11_MOUSE | only in AngII |
| 40S ribosomal protein S9 OS=Mus muscu      | RS9_MOUSE   | only in AngII |

|                                             |              |               |
|---------------------------------------------|--------------|---------------|
| T-complex protein 1 subunit beta OS=Mus     | TCPB_MOUSE   | only in AngII |
| Isoform 3 of Soluble calcium-activated nu   | CANT1_MOUSE  | only in AngII |
| Isoform 2 of Adenylate kinase isoenzyme     | KAD1_MOUSE   | only in AngII |
| Lysosomal alpha-glucosidase OS=Mus mu       | LYAG_MOUSE   | only in AngII |
| Phosphoserine phosphatase OS=Mus mus        | SERB_MOUSE   | only in AngII |
| Isoform 2 of Acyl-protein thioesterase 1 C  | LYPA1_MOUSE  | only in AngII |
| Isoform 2 of Elongation factor 1-delta OS   | EF1D_MOUSE   | only in AngII |
| Isoform 2 of Aly/REF export factor 2 OS=    | ALRF2_MOUSE  | only in AngII |
| UDP-N-acetylhexosamine pyrophosphoryl       | UAP1L_MOUSE  | only in AngII |
| N(G),N(G)-dimethylarginine dimethylami      | DDAH1_MOUSE  | only in AngII |
| Myozenin-2 OS=Mus musculus OX=10090         | MYOZ2_MOUSE  | only in AngII |
| Extracellular sulfatase Sulf-2 OS=Mus mu    | SULF2_MOUSE  | only in AngII |
| Receptor-type tyrosine-protein phosphata    | PTPRM_MOUSE  | only in AngII |
| Inorganic pyrophosphatase OS=Mus musc       | IPYR_MOUSE   | only in AngII |
| N-acetylneuraminate lyase OS=Mus mus        | NPL_MOUSE    | only in AngII |
| GTP-binding protein SAR1b OS=Mus mus        | SAR1B_MOUSE  | only in AngII |
| Translin OS=Mus musculus OX=10090 GN        | TSN_MOUSE    | only in AngII |
| Myomesin 2 OS=Mus musculus OX=10090         | Q14BI5_MOUSE | only in AngII |
| Nectin-2 OS=Mus musculus OX=10090 GN        | NECT2_MOUSE  | only in AngII |
| Oligoribonuclease, mitochondrial OS=Mu      | ORN_MOUSE    | only in AngII |
| Histidine--tRNA ligase, cytoplasmic OS=M    | SYHC_MOUSE   | only in AngII |
| 60S ribosomal protein L15 OS=Mus musc       | RL15_MOUSE   | only in AngII |
| Stromelysin-3 OS=Mus musculus OX=100        | MMP11_MOUSE  | only in AngII |
| 45 kDa calcium-binding protein OS=Mus r     | CAB45_MOUSE  | only in AngII |
| MLV-related proviral Env polyprotein OS=    | ENV1_MOUSE   | only in AngII |
| Matrix remodeling-associated protein 8 C    | MXRA8_MOUSE  | only in AngII |
| 26S proteasome non-ATPase regulatory s      | PSMD9_MOUSE  | only in AngII |
| Ras-related protein Rab-5C OS=Mus mus       | RAB5C_MOUSE  | only in AngII |
| Arginine--tRNA ligase, cytoplasmic OS=M     | SYRC_MOUSE   | only in AngII |
| Disintegrin and metalloproteinase domai     | ADA10_MOUSE  | only in AngII |
| N(G),N(G)-dimethylarginine dimethylami      | DDAH2_MOUSE  | only in AngII |
| Pyruvate dehydrogenase E1 component s       | ODPB_MOUSE   | only in AngII |
| Ubiquitin thioesterase OTUB1 OS=Mus m       | OTUB1_MOUSE  | only in AngII |
| 60S ribosomal protein L8 OS=Mus muscu       | RL8_MOUSE    | only in AngII |
| Isoform Cytoplasmic of Fumarate hydrata     | FUMH_MOUSE   | only in AngII |
| Isoform 2 of Mannan-binding lectin serin    | MASP1_MOUSE  | only in AngII |
| Isoform 2 of Protein CDV3 OS=Mus musc       | CDV3_MOUSE   | only in AngII |
| Isoform 2 of Sacsin OS=Mus musculus OX      | SACS_MOUSE   | only in AngII |
| Isoform 3 of NSFL1 cofactor p47 OS=Mus      | NSF1C_MOUSE  | only in AngII |
| Alpha-mannosidase 2 OS=Mus musculus         | MA2A1_MOUSE  | only in AngII |
| Growth/differentiation factor 15 OS=Mus     | GDF15_MOUSE  | only in AngII |
| Isoform 2 of Roundabout homolog 4 OS=       | ROBO4_MOUSE  | only in AngII |
| Isoform 2 of Poly(rC)-binding protein 2 OS  | PCBP2_MOUSE  | only in AngII |
| Acetyl-CoA acetyltransferase, cytosolic OS  | THIC_MOUSE   | only in AngII |
| Tolloid-like protein 1 OS=Mus musculus C    | TLL1_MOUSE   | only in AngII |
| ATP synthase subunit gamma, mitochond       | ATPG_MOUSE   | only in AngII |
| Cytochrome c oxidase subunit 2 OS=Mus       | COX2_MOUSE   | only in AngII |
| EGF-containing fibulin-like extracellular n | FBLN4_MOUSE  | only in AngII |



|                                                                                               |              |               |
|-----------------------------------------------------------------------------------------------|--------------|---------------|
| E3 ubiquitin-protein ligase NEDD4 OS=Mus musculus                                             | NEDD4_MOUSE  | only in AngII |
| Serine/threonine-protein phosphatase 2A OS=Mus musculus                                       | PP2AA_MOUSE  | only in AngII |
| 40S ribosomal protein S11 OS=Mus musculus                                                     | RS11_MOUSE   | only in AngII |
| SPARC-like protein 1 OS=Mus musculus                                                          | SPRL1_MOUSE  | only in AngII |
| Isoform 2 of 2-oxoglutarate dehydrogenase OS=Mus musculus                                     | ODO1_MOUSE   | only in AngII |
| Adapter molecule crk OS=Mus musculus                                                          | CRK_MOUSE    | only in AngII |
| Isoform 2 of UTP--glucose-1-phosphate uridylyltransferase OS=Mus musculus                     | UGPA_MOUSE   | only in AngII |
| Obg-like ATPase 1 OS=Mus musculus                                                             | OLA1_MOUSE   | only in AngII |
| 60S ribosomal protein L21 OS=Mus musculus                                                     | RL21_MOUSE   | only in AngII |
| Disintegrin and metalloproteinase domain 19 OS=Mus musculus                                   | ADA19_MOUSE  | only in AngII |
| Neuropilin-1 OS=Mus musculus                                                                  | NRP1_MOUSE   | only in AngII |
| Caveolae-associated protein 1 OS=Mus musculus                                                 | CAVN1_MOUSE  | only in AngII |
| Isoform B of Heat shock protein beta-1 OS=Mus musculus                                        | HSPB1_MOUSE  | only in AngII |
| Calponin-2 OS=Mus musculus                                                                    | CNN2_MOUSE   | only in AngII |
| Proliferating cell nuclear antigen OS=Mus musculus                                            | PCNA_MOUSE   | only in AngII |
| 26S proteasome non-ATPase regulatory subunit 5 OS=Mus musculus                                | PSDE_MOUSE   | only in AngII |
| REVERSED Isoform 2 of VPS9 domain-containing protein OS=Mus musculus                          | VP9D1_MOUSE  | only in AngII |
| Cluster of Ras-related protein Rab-2A OS=Mus musculus                                         | RAB2A_MOUSE  | only in AngII |
| Cytosolic non-specific dipeptidase OS=Mus musculus                                            | CNDP2_MOUSE  | only in AngII |
| Persulfide dioxygenase ETHE1, mitochondrial OS=Mus musculus                                   | ETHE1_MOUSE  | only in AngII |
| Plastin-3 OS=Mus musculus                                                                     | PLST_MOUSE   | only in AngII |
| Serine/threonine-protein phosphatase PP1A OS=Mus musculus                                     | PP1A_MOUSE   | only in AngII |
| Isoform 2 of Small glutamine-rich tetratricopeptide repeat-containing protein OS=Mus musculus | SGTA_MOUSE   | only in AngII |
| Coatmer subunit alpha OS=Mus musculus                                                         | COPA_MOUSE   | only in AngII |
| Caprin-1 OS=Mus musculus                                                                      | CAPR1_MOUSE  | only in AngII |
| Trifunctional enzyme subunit beta, mitochondrial OS=Mus musculus                              | ECHB_MOUSE   | only in AngII |
| Mitogen-activated protein kinase 3 OS=Mus musculus                                            | MK03_MOUSE   | only in AngII |
| ADP-ribosylation factor-like protein 3 OS=Mus musculus                                        | ARL3_MOUSE   | only in AngII |
| Coatmer subunit zeta-1 OS=Mus musculus                                                        | COPZ1_MOUSE  | only in AngII |
| Endothelial cell-selective adhesion molecule OS=Mus musculus                                  | ESAM_MOUSE   | only in AngII |
| Importin subunit beta-1 OS=Mus musculus                                                       | IMB1_MOUSE   | only in AngII |
| Lysosome-associated membrane glycoprotein 1 OS=Mus musculus                                   | LAMP1_MOUSE  | only in AngII |
| Profilin-1 OS=Mus musculus                                                                    | PROF1_MOUSE  | only in AngII |
| RNA-binding protein 3 OS=Mus musculus                                                         | RBM3_MOUSE   | only in AngII |
| Vacuolar protein sorting-associated protein 35 OS=Mus musculus                                | VPS35_MOUSE  | only in AngII |
| Heterogeneous nuclear ribonucleoprotein A1 OS=Mus musculus                                    | ROA1_MOUSE   | only in AngII |
| 60S ribosomal protein L11 (Fragment) OS=Mus musculus                                          | A2BH06_MOUSE | only in AngII |
| Ribonuclease 4 OS=Mus musculus                                                                | Q8C7E4_MOUSE | only in AngII |
| 40S ribosomal protein S13 OS=Mus musculus                                                     | RS13_MOUSE   | only in AngII |
| Catalase OS=Mus musculus                                                                      | CATA_MOUSE   | only in AngII |
| Isoform PDE2A1 of cGMP-dependent 3',5'-cyclic phosphodiesterase OS=Mus musculus               | PDE2A_MOUSE  | only in AngII |
| Peptidyl-prolyl cis-trans isomerase-like 1 OS=Mus musculus                                    | PPIL1_MOUSE  | only in AngII |
| Dynactin subunit 3 OS=Mus musculus                                                            | DCTN3_MOUSE  | only in AngII |
| Glycerol-3-phosphate phosphatase OS=Mus musculus                                              | PGP_MOUSE    | only in AngII |
| Tyrosine--tRNA ligase, cytoplasmic OS=Mus musculus                                            | SYYC_MOUSE   | only in AngII |
| Alpha-L-iduronidase OS=Mus musculus                                                           | IDUA_MOUSE   | only in AngII |
| Collagen triple helix repeat-containing protein 1 OS=Mus musculus                             | CTHR1_MOUSE  | only in AngII |
| Calcyclin-binding protein OS=Mus musculus                                                     | CYBP_MOUSE   | only in AngII |



|                                                      |              |               |
|------------------------------------------------------|--------------|---------------|
| MOB kinase activator 1B OS=Mus musculus              | MOB1B_MOUSE  | only in AngII |
| N-acetyl-D-glucosamine kinase OS=Mus musculus        | NAGK_MOUSE   | only in AngII |
| Isoform B of AP-2 complex subunit alpha              | AP2A1_MOUSE  | only in AngII |
| Small ubiquitin-related modifier 2 OS=Mus musculus   | D3Z794_MOUSE | only in AngII |
| T-complex protein 1 subunit gamma OS=Mus musculus    | TCPG_MOUSE   | only in AngII |
| Nucleotide exchange factor SIL1 OS=Mus musculus      | SIL1_MOUSE   | only in AngII |
| 60S ribosomal protein L24 OS=Mus musculus            | RL24_MOUSE   | only in AngII |
| Isoform 2 of Armadillo repeat-containing protein 10  | ARM10_MOUSE  | only in AngII |
| Exostosin-2 OS=Mus musculus OX=10090                 | EXT2_MOUSE   | only in AngII |
| Medium-chain specific acyl-CoA dehydrogenase 10      | ACADM_MOUSE  | only in AngII |
| Exostosin-1 OS=Mus musculus OX=10090                 | EXT1_MOUSE   | only in AngII |
| Histone H1.2 OS=Mus musculus OX=10090                | H12_MOUSE    | only in AngII |
| Ribosyl-dihydro-nicotinamide dehydrogenase 2         | NQO2_MOUSE   | only in AngII |
| PDZ and LIM domain protein 1 OS=Mus musculus         | PDL1_MOUSE   | only in AngII |
| Rho-related GTP-binding protein RhoG OS=Mus musculus | RHOG_MOUSE   | only in AngII |
| Stathmin OS=Mus musculus OX=10090                    | STMN1_MOUSE  | only in AngII |
| Isoform 2 of Intercellular adhesion molecule 1       | ICAM1_MOUSE  | only in AngII |
| Isoform 2 of COP9 signalosome complex subunit 7A     | CSN7A_MOUSE  | only in AngII |
| Keratin, type II cytoskeletal 8 OS=Mus musculus      | K2C8_MOUSE   | only in AngII |
| Protein transport protein Sec23A OS=Mus musculus     | SC23A_MOUSE  | only in AngII |
| Ephrin-B2 OS=Mus musculus OX=10090                   | EFNB2_MOUSE  | only in AngII |
| WNT1-inducible-signaling pathway protein 1           | WISP1_MOUSE  | only in AngII |
| Aspartyl aminopeptidase OS=Mus musculus              | DNPEP_MOUSE  | only in AngII |
| Dihydro-lipoyllysine-residue acetyltransferase 2     | ODP2_MOUSE   | only in AngII |
| DNA-directed RNA polymerase II subunit 7             | RPB7_MOUSE   | only in AngII |
| ES1 protein homolog, mitochondrial OS=Mus musculus   | ES1_MOUSE    | only in AngII |
| Isoform 2 of N-alpha-acetyltransferase 50            | NAA50_MOUSE  | only in AngII |
| Src substrate cortactin OS=Mus musculus              | SRC8_MOUSE   | only in AngII |
| Sialidase-1 OS=Mus musculus OX=10090                 | NEUR1_MOUSE  | only in AngII |
| Matrix metalloproteinase-19 OS=Mus musculus          | MMP19_MOUSE  | only in AngII |
| Isoform 3 of RNA polymerase-associated protein 9     | CTR9_MOUSE   | only in AngII |
| Isovaleryl-CoA dehydrogenase, mitochondrial          | IVD_MOUSE    | only in AngII |
| Protein MEMO1 OS=Mus musculus OX=10090               | MEMO1_MOUSE  | only in AngII |
| Mitogen-activated protein kinase 1 OS=Mus musculus   | MK01_MOUSE   | only in AngII |
| Guanine nucleotide-binding protein G(I)/G(12)        | GBB2_MOUSE   | only in AngII |
| Isoamyl acetate-hydrolyzing esterase 1 homolog       | IAH1_MOUSE   | only in AngII |
| Xaa-Pro dipeptidase OS=Mus musculus OX=10090         | PEPD_MOUSE   | only in AngII |
| Ras-related protein Rab-14 OS=Mus musculus           | MYH6_MOUSE   | 243,00        |

| Identified Proteins                       | Accession Number | Ratio BPM5/Ctr |
|-------------------------------------------|------------------|----------------|
| Fermitin family homolog 3 OS=Mus mu       | URP2_MOUSE       | 0,00           |
| GTP-binding protein OS=Mus musculus       | Q61635_MOUSE     | 0,00           |
| Nucleoprotein TPR OS=Mus musculus O       | TPR_MOUSE        | 0,00           |
| Arachidonate 12-lipoxygenase, 12S-type    | LOX12_MOUSE      | 0,00           |
| Protein kinase C OS=Mus musculus OX=      | Q4VA93_MOUSE     | 0,00           |
| Pyrin and HIN domain-containing protei    | IFIX_MOUSE       | 0,00           |
| EH domain-containing protein 4 OS=Mus     | EHD4_MOUSE       | 0,00           |
| Isoform 2 of Phosphatidylinositol 3,4,5-t | SHIP1_MOUSE      | 0,00           |
| Calpain-2 catalytic subunit OS=Mus mus    | CAN2_MOUSE       | 0,00           |
| SWI/SNF-related matrix-associated acti    | SMCA5_MOUSE      | 0,00           |
| Platelet factor 4 OS=Mus musculus OX=     | PLF4_MOUSE       | 0,00           |
| Ly6g6f protein OS=Mus musculus OX=10      | B2RXM6_MOUSE     | 0,00           |
| Nuclear mitotic apparatus protein 1 OS=   | NUMA1_MOUSE      | 0,00           |
| CCR4-NOT transcription complex subuni     | CNOT9_MOUSE      | 0,00           |
| EH domain-containing protein 1 OS=Mus     | EHD1_MOUSE       | 0,00           |
| V-type proton ATPase subunit B, brain is  | VATB2_MOUSE      | 0,00           |
| Immunoglobulin kappa variable 4-57 (Fr    | A0A0A6YYE7_MOUSE | 0,00           |
| Septin-7 OS=Mus musculus OX=10090 C       | SEPT7_MOUSE      | 0,00           |
| Complement C4-B OS=Mus musculus O         | CO4B_MOUSE       | 0,00           |
| Very-long-chain (3R)-3-hydroxyacyl-CoA    | HACD3_MOUSE      | 0,00           |
| Bifunctional glutamate/proline--tRNA li   | SYEP_MOUSE       | 0,00           |
| Tubulin beta-1 chain OS=Mus musculus      | TBB1_MOUSE       | 0,00           |
| Copine-3 OS=Mus musculus OX=10090 C       | CPNE3_MOUSE      | 0,00           |
| REVERSED Titin OS=Mus musculus OX=        | TITIN_MOUSE      | 0,00           |
| Isoform HK1 of Hexokinase-1 OS=Mus m      | HXK1_MOUSE       | 0,00           |
| Coronin-1A OS=Mus musculus OX=1009        | COR1A_MOUSE      | 0,00           |
| Peptidyl-prolyl cis-trans isomerase F, m  | PIPF_MOUSE       | 0,00           |
| Isoform 2 of Tyrosine-protein phosphata   | PTN6_MOUSE       | 0,00           |
| Isoform 2 of Heterogeneous nuclear ribo   | HNRPK_MOUSE      | 0,00           |
| Malectin OS=Mus musculus OX=10090 C       | MLEC_MOUSE       | 0,00           |
| NADH dehydrogenase [ubiquinone] 1 alp     | NDUA8_MOUSE      | 0,00           |
| Lamin-B2 OS=Mus musculus OX=10090         | LMNB2_MOUSE      | 0,00           |
| Trafficking protein particle complex sub  | TPPC3_MOUSE      | 0,00           |
| Isoform 2 of Programmed cell death pro    | PDCD6_MOUSE      | 0,00           |
| Coagulation factor XIII A chain OS=Mus    | F13A_MOUSE       | 0,00           |
| Isoform Delta of Lamina-associated pol    | LAP2B_MOUSE      | 0,00           |
| Pre-mRNA-processing-splicing factor 8     | PRP8_MOUSE       | 0,00           |
| Polypyrimidine tract-binding protein 1 C  | PTBP1_MOUSE      | 0,00           |
| Isoform 2 of Calcium/calmodulin-depen     | KCC2D_MOUSE      | 0,00           |
| Protein ERGIC-53 OS=Mus musculus OX       | LMAN1_MOUSE      | 0,00           |
| Isoform 2 of Heterogeneous nuclear ribo   | HNRPU_MOUSE      | 0,00           |
| Protein NipSnap homolog 3B OS=Mus m       | NPS3B_MOUSE      | 0,00           |
| Endoplasmic reticulum resident protein    | ERP44_MOUSE      | 0,00           |
| Metalloproteinase inhibitor 3 OS=Mus m    | TIMP3_MOUSE      | 0,00           |
| Coatomer subunit beta' OS=Mus muscu       | COPB2_MOUSE      | 0,00           |
| Isoform CNPI of 2',3'-cyclic-nucleotide 3 | CN37_MOUSE       | 0,00           |
| NADH dehydrogenase [ubiquinone] flavo     | NDUV2_MOUSE      | 0,00           |

|                                           |              |      |
|-------------------------------------------|--------------|------|
| Stress-70 protein, mitochondrial OS=Mu    | GRP75_MOUSE  | 0,00 |
| Trafficking protein particle complex sub  | TPPC4_MOUSE  | 0,00 |
| Isoform 2 of Inter alpha-trypsin inhibito | ITIH4_MOUSE  | 0,00 |
| Nucleophosmin OS=Mus musculus OX=         | NPM_MOUSE    | 0,00 |
| Acyl-coenzyme A thioesterase 2, mitoch    | ACOT2_MOUSE  | 0,00 |
| Dolichyl-diphosphooligosaccharide--prot   | OST48_MOUSE  | 0,00 |
| Isoform SERCA3A of Sarcoplasmic/endoc     | AT2A3_MOUSE  | 0,00 |
| 26S proteasome non-ATPase regulatory      | PSMD2_MOUSE  | 0,00 |
| Fibroblast growth factor 2 OS=Mus mus     | FGF2_MOUSE   | 0,00 |
| BTB/POZ domain-containing protein KC      | KCD12_MOUSE  | 0,00 |
| Complement C3 OS=Mus musculus OX=         | CO3_MOUSE    | 0,00 |
| Isoform VEGF-1 of Vascular endothelial    | VEGFA_MOUSE  | 0,00 |
| Calpain small subunit 1 OS=Mus muscul     | CPNS1_MOUSE  | 0,00 |
| Isoform 2 of Tenascin-N OS=Mus muscul     | TENN_MOUSE   | 0,00 |
| Isoform 2 of Serine/threonine-protein p   | PGAM5_MOUSE  | 0,00 |
| Ras GTPase-activating-like protein IQGA   | IQGA1_MOUSE  | 0,00 |
| Dihydrolipoyllysine-residue succinyltrans | ODO2_MOUSE   | 0,00 |
| Cytoskeleton-associated protein 4 OS=M    | CKAP4_MOUSE  | 0,00 |
| Isoform Short of H-2 class II histocompa  | HG2A_MOUSE   | 0,00 |
| Tartrate-resistant acid phosphatase typ   | PPA5_MOUSE   | 0,00 |
| Isoform Smooth muscle of Myosin light     | MYL6_MOUSE   | 0,00 |
| Integral membrane protein 2B OS=Mus       | ITM2B_MOUSE  | 0,00 |
| Isoform 2 of Tyrosine-protein phosphata   | PTN11_MOUSE  | 0,00 |
| Immunoglobulin superfamily member 8       | IGSF8_MOUSE  | 0,00 |
| Clathrin heavy chain 1 OS=Mus musculu     | CLH1_MOUSE   | 0,00 |
| Platelet glycoprotein IX OS=Mus muscul    | GPIX_MOUSE   | 0,00 |
| ELAV-like protein 1 OS=Mus musculus C     | ELAV1_MOUSE  | 0,00 |
| Apolipoprotein A-I OS=Mus musculus O      | APOA1_MOUSE  | 0,00 |
| Cluster of Ras-related protein Rap-1b O   | RAP1B_MOUSE  | 0,00 |
| Arginine-rich, mutated in early stage tu  | Q3TMX5_MOUSE | 0,00 |
| Cluster of Ras-related protein Rab-1B O   | RAB1B_MOUSE  | 0,00 |
| Dihydrolipoyl dehydrogenase, mitochon     | DLDH_MOUSE   | 0,00 |
| Thioredoxin domain-containing protein     | TXD12_MOUSE  | 0,00 |
| Hydroxyacyl-coenzyme A dehydrogenase      | HCDH_MOUSE   | 0,00 |
| Cluster of ADP-ribosylation factor 1 OS=  | ARF1_MOUSE   | 0,00 |
| Spectrin beta chain, non-erythrocytic 1 C | SPTB2_MOUSE  | 0,00 |
| Isoform Short of Latent-transforming gr   | LTBP1_MOUSE  | 0,00 |
| Mesothelin OS=Mus musculus OX=1009        | MSLN_MOUSE   | 0,00 |
| Complement C1q tumor necrosis factor-     | C1QT5_MOUSE  | 0,00 |
| Titin OS=Mus musculus OX=10090 GN=        | TITIN_MOUSE  | 0,00 |
| Latent-transforming growth factor beta    | LTBP2_MOUSE  | 0,00 |
| 40S ribosomal protein S18 OS=Mus mus      | RS18_MOUSE   | 0,00 |
| Glutathione peroxidase 3 OS=Mus musc      | GPX3_MOUSE   | 0,00 |
| Delta(3,5)-Delta(2,4)-dienoyl-CoA isome   | ECH1_MOUSE   | 0,00 |
| Proteasome subunit beta type-3 OS=MU      | PSB3_MOUSE   | 0,00 |
| Destrin OS=Mus musculus OX=10090 G        | DEST_MOUSE   | 0,00 |
| Ras-related protein Rab-11B OS=Mus m      | RB11B_MOUSE  | 0,00 |
| Cluster of Tropomyosin alpha-1 chain O    | TPM1_MOUSE   | 0,00 |

|                                            |             |      |
|--------------------------------------------|-------------|------|
| Ras suppressor protein 1 OS=Mus musc       | RSU1_MOUSE  | 0,00 |
| Protein-lysine 6-oxidase OS=Mus muscu      | LYOX_MOUSE  | 0,00 |
| Translationally-controlled tumor protei    | TCTP_MOUSE  | 0,00 |
| Protein CTLA-2-alpha OS=Mus musculus       | CTL2A_MOUSE | 0,00 |
| Angiopoietin-related protein 2 OS=Mus      | ANGL2_MOUSE | 0,00 |
| Angiopoietin-1 OS=Mus musculus OX=1        | ANGP1_MOUSE | 0,00 |
| Tropomodulin-3 OS=Mus musculus OX=         | TMOD3_MOUSE | 0,01 |
| ATP synthase subunit alpha, mitochondr     | ATPA_MOUSE  | 0,01 |
| Vesicular integral-membrane protein VI     | LMAN2_MOUSE | 0,04 |
| Myosin-9 OS=Mus musculus OX=10090          | MYH9_MOUSE  | 0,04 |
| von Willebrand factor OS=Mus musculus      | VWF_MOUSE   | 0,04 |
| Adenylyl cyclase-associated protein 1 O    | CAP1_MOUSE  | 0,04 |
| 60 kDa heat shock protein, mitochondria    | CH60_MOUSE  | 0,05 |
| Actin-related protein 2/3 complex subu     | ARPC3_MOUSE | 0,05 |
| Talin-1 OS=Mus musculus OX=10090 GN        | TLN1_MOUSE  | 0,05 |
| Multimerin-1 OS=Mus musculus OX=10         | MMRN1_MOUSE | 0,05 |
| Superoxide dismutase [Mn], mitochondr      | SODM_MOUSE  | 0,05 |
| Actin-related protein 2/3 complex subu     | ARPC2_MOUSE | 0,05 |
| Fibrinogen alpha chain OS=Mus muscul       | FIBA_MOUSE  | 0,06 |
| Isoform 2 of MICOS complex subunit Mi      | MIC60_MOUSE | 0,06 |
| Coagulation factor V OS=Mus musculus       | FA5_MOUSE   | 0,08 |
| Enoyl-CoA delta isomerase 1, mitochond     | ECI1_MOUSE  | 0,08 |
| Endonuclease domain-containing 1 prot      | ENDD1_MOUSE | 0,08 |
| Cell division control protein 42 homolog   | CDC42_MOUSE | 0,08 |
| Isoform 2 of Band 3 anion transport pro    | B3AT_MOUSE  | 0,08 |
| Fibrinogen beta chain OS=Mus musculus      | FIBB_MOUSE  | 0,09 |
| Eukaryotic translation initiation factor 5 | IF5A1_MOUSE | 0,10 |
| Thrombospondin-2 OS=Mus musculus C         | TSP2_MOUSE  | 0,11 |
| Gamma-interferon-inducible lysosomal       | GILT_MOUSE  | 0,11 |
| Actin-related protein 2/3 complex subu     | ARPC5_MOUSE | 0,12 |
| Fibrinogen gamma chain OS=Mus muscu        | FIBG_MOUSE  | 0,12 |
| ATP synthase subunit beta, mitochondri     | ATPB_MOUSE  | 0,12 |
| Actin-related protein 2/3 complex subu     | ARPC4_MOUSE | 0,13 |
| Lysosomal acid lipase/cholesteryl ester    | LICH_MOUSE  | 0,13 |
| Inositol monophosphatase 1 OS=Mus m        | IMPA1_MOUSE | 0,13 |
| Glucosamine-6-phosphate isomerase 1        | GNPI1_MOUSE | 0,13 |
| 26S proteasome non-ATPase regulatory       | PSMD8_MOUSE | 0,13 |
| Aspartate aminotransferase, mitochond      | AATM_MOUSE  | 0,13 |
| Gelsolin OS=Mus musculus OX=10090 G        | GELS_MOUSE  | 0,13 |
| Protein SEC13 homolog OS=Mus muscu         | SEC13_MOUSE | 0,13 |
| Lamin-B1 OS=Mus musculus OX=10090          | LMNB1_MOUSE | 0,14 |
| Filamin-A OS=Mus musculus OX=10090         | FLNA_MOUSE  | 0,14 |
| Glia-derived nexin OS=Mus musculus O       | GDN_MOUSE   | 0,14 |
| Macrophage metalloelastase OS=Mus r        | MMP12_MOUSE | 0,14 |
| Protein-glutamine gamma-glutamyltran       | TGM2_MOUSE  | 0,14 |
| Peptidyl-prolyl cis-trans isomerase B OS   | PPIB_MOUSE  | 0,14 |
| Hypoxia up-regulated protein 1 OS=Mus      | HYOU1_MOUSE | 0,14 |
| Protein FAM3C OS=Mus musculus OX=1         | FAM3C_MOUSE | 0,14 |

|                                           |              |      |
|-------------------------------------------|--------------|------|
| Cathepsin S OS=Mus musculus OX=1009       | CATS_MOUSE   | 0,15 |
| GrpE protein homolog 1, mitochondrial     | GRPE1_MOUSE  | 0,15 |
| EMILIN-1 OS=Mus musculus OX=10090         | EMIL1_MOUSE  | 0,16 |
| Urokinase-type plasminogen activator C    | UROK_MOUSE   | 0,16 |
| Cluster of Isoform 2 of Tropomyosin alp   | TPM3_MOUSE   | 0,17 |
| Protein CREG1 OS=Mus musculus OX=1        | CREG1_MOUSE  | 0,17 |
| Ubiquitin-60S ribosomal protein L40 OS    | RL40_MOUSE   | 0,17 |
| Chitinase-like protein 3 OS=Mus muscul    | CHIL3_MOUSE  | 0,17 |
| Marginal zone B- and B1-cell-specific pr  | MZB1_MOUSE   | 0,18 |
| Thioredoxin-dependent peroxide reducta    | PRDX3_MOUSE  | 0,18 |
| Collagen alpha-1(III) chain OS=Mus mus    | CO3A1_MOUSE  | 0,18 |
| Isoform Short of Collagen alpha-1(XI) ch  | COBA1_MOUSE  | 0,18 |
| Platelet glycoprotein Ib beta chain OS=M  | GP1BB_MOUSE  | 0,19 |
| F-actin-capping protein subunit alpha-2   | CAZA2_MOUSE  | 0,19 |
| Calreticulin OS=Mus musculus OX=1009      | CALR_MOUSE   | 0,20 |
| IST1 homolog OS=Mus musculus OX=10        | IST1_MOUSE   | 0,20 |
| Proteasome subunit alpha type-4 OS=M      | PSA4_MOUSE   | 0,20 |
| Transforming growth factor beta-1 prop    | TGFB1_MOUSE  | 0,22 |
| Isoform 2 of Spectrin alpha chain, non-e  | SPTN1_MOUSE  | 0,22 |
| Desmin OS=Mus musculus OX=10090 G         | DESM_MOUSE   | 0,22 |
| Purine nucleoside phosphorylase OS=M      | PNPH_MOUSE   | 0,23 |
| NPC intracellular cholesterol transporte  | NPC2_MOUSE   | 0,23 |
| Rho GDP-dissociation inhibitor 2 OS=M     | GDIR2_MOUSE  | 0,23 |
| Cleavage and polyadenylation specific     | CPSF5_MOUSE  | 0,24 |
| Isoform 2 of F-actin-capping protein suk  | CAPZB_MOUSE  | 0,24 |
| L-lactate dehydrogenase A chain OS=M      | LDHA_MOUSE   | 0,24 |
| Myosin regulatory light chain 12B OS=M    | ML12B_MOUSE  | 0,25 |
| Vasodilator-stimulated phosphoprotein     | VASP_MOUSE   | 0,25 |
| Isoform IGF-1B of Insulin-like growth fac | IGF1_MOUSE   | 0,25 |
| Cluster of Isoform 2 of Heterogeneous r   | HNRPF_MOUSE  | 0,25 |
| Phosphatidylinositol transfer protein alp | PIPNA_MOUSE  | 0,25 |
| Isoform PLEC-1I of Plectin OS=Mus mus     | PLEC_MOUSE   | 0,25 |
| Malate dehydrogenase, mitochondrial C     | MDHM_MOUSE   | 0,26 |
| Collagen, type VI, alpha 3 OS=Mus musc    | E9PWQ3_MOUSE | 0,26 |
| F-actin-capping protein subunit alpha-1   | CAZA1_MOUSE  | 0,27 |
| Peptidyl-prolyl cis-trans isomerase C OS  | PPIC_MOUSE   | 0,28 |
| Deoxyribonuclease-2-alpha OS=Mus mu       | DNS2A_MOUSE  | 0,29 |
| Heme oxygenase 1 OS=Mus musculus C        | HMOX1_MOUSE  | 0,29 |
| Complement C1q subcomponent subuni        | C1QC_MOUSE   | 0,29 |
| Protein disulfide-isomerase OS=Mus m      | PDIA1_MOUSE  | 0,30 |
| Complement C1q subcomponent subuni        | C1QA_MOUSE   | 0,30 |
| Metalloproteinase inhibitor 2 OS=Mus r    | Q6PI17_MOUSE | 0,30 |
| Cluster of Elongation factor 1-alpha 1 O  | EF1A1_MOUSE  | 0,31 |
| Cluster of Actin, cytoplasmic 1 OS=Mus    | ACTB_MOUSE   | 0,33 |
| Complement C1q subcomponent subuni        | C1QB_MOUSE   | 0,33 |
| Component of Sp100-rs OS=Mus muscu        | CSPRS_MOUSE  | 0,33 |
| Actin-related protein 3 OS=Mus muscul     | ARP3_MOUSE   | 0,33 |
| Proteasome subunit alpha type-2 OS=M      | PSA2_MOUSE   | 0,33 |



|                                           |              |      |
|-------------------------------------------|--------------|------|
| Germinal-center associated nuclear pro    | GANP_MOUSE   | 0,33 |
| Putative phospholipase B-like 2 OS=Mus    | PLBL2_MOUSE  | 0,33 |
| Isoform 2 of Neutral alpha-glucosidase    | GANAB_MOUSE  | 0,33 |
| Cluster of Histone H2A type 1-B OS=Mus    | H2A1B_MOUSE  | 0,35 |
| Cystatin-C OS=Mus musculus OX=10090       | CYTC_MOUSE   | 0,35 |
| Isoform 2 of Trem-like transcript 1 prote | TRML1_MOUSE  | 0,36 |
| Ferritin heavy chain OS=Mus musculus      | FRIH_MOUSE   | 0,36 |
| Integrin alpha-IIb OS=Mus musculus OX     | ITA2B_MOUSE  | 0,36 |
| Cathepsin L1 OS=Mus musculus OX=100       | CATL1_MOUSE  | 0,36 |
| Pigment epithelium-derived factor OS=     | PEDF_MOUSE   | 0,36 |
| Ferritin OS=Mus musculus OX=10090 G       | Q9CPX4_MOUSE | 0,36 |
| Antithrombin-III OS=Mus musculus OX=      | ANT3_MOUSE   | 0,37 |
| 40S ribosomal protein S4, X isoform OS    | RS4X_MOUSE   | 0,38 |
| C-C motif chemokine 2 OS=Mus muscul       | CCL2_MOUSE   | 0,38 |
| Delta-aminolevulinic acid dehydratase C   | HEM2_MOUSE   | 0,40 |
| Flavin reductase (NADPH) OS=Mus mus       | BLVRB_MOUSE  | 0,40 |
| Isoform 2 of Immunoglobulin heavy con     | IGHM_MOUSE   | 0,40 |
| Fibrillin-1 OS=Mus musculus OX=10090      | FBN1_MOUSE   | 0,40 |
| Nucleoside diphosphate kinase B OS=M      | NDKB_MOUSE   | 0,40 |
| Cluster of Glyceraldehyde-3-phosphate     | G3P_MOUSE    | 0,41 |
| Ganglioside GM2 activator OS=Mus mu       | SAP3_MOUSE   | 0,41 |
| Rab GDP dissociation inhibitor beta OS=   | GDIB_MOUSE   | 0,41 |
| Apolipoprotein E OS=Mus musculus OX=      | APOE_MOUSE   | 0,41 |
| Transaldolase OS=Mus musculus OX=10       | TALDO_MOUSE  | 0,41 |
| Endoplasmic reticulum resident protein    | ERP29_MOUSE  | 0,42 |
| Proteasome subunit alpha type-3 OS=M      | PSA3_MOUSE   | 0,42 |
| H-2 class I histocompatibility antigen, K | G3UXW2_MOUSE | 0,43 |
| Rho GDP-dissociation inhibitor 1 OS=M     | GDIR1_MOUSE  | 0,43 |
| Serum albumin OS=Mus musculus OX=1        | ALBU_MOUSE   | 0,43 |
| Tropomyosin alpha-4 chain OS=Mus mu       | TPM4_MOUSE   | 0,44 |
| Isoform 2 of Sorcin OS=Mus musculus C     | SORCN_MOUSE  | 0,44 |
| Proteasome subunit beta type-6 OS=M       | PSB6_MOUSE   | 0,44 |
| Collagen alpha-1(V) chain OS=Mus mus      | CO5A1_MOUSE  | 0,44 |
| cont   001   sp   ALBU_BOVIN              |              | 0,45 |
| Carbonic anhydrase 2 OS=Mus musculus      | CAH2_MOUSE   | 0,46 |
| Renin receptor OS=Mus musculus OX=1       | REN_R_MOUSE  | 0,46 |
| N(4)-(beta-N-acetylglucosaminy)-L-asp     | ASPG_MOUSE   | 0,46 |
| Peroxiredoxin-2 OS=Mus musculus OX=       | PRDX2_MOUSE  | 0,46 |
| Cluster of Pyruvate kinase PKM OS=Mus     | KPYM_MOUSE   | 0,46 |
| Isoform 2 of Galectin-9 OS=Mus muscu      | LEG9_MOUSE   | 0,50 |
| Dipeptidyl peptidase 1 OS=Mus muscul      | CATC_MOUSE   | 0,50 |
| Cluster of Phosphoglycerate mutase 1 C    | PGAM1_MOUSE  | 0,50 |
| S-formylglutathione hydrolase OS=Mus      | H3BKH6_MOUSE | 0,50 |
| Beta-glucuronidase OS=Mus musculus C      | BGLR_MOUSE   | 0,50 |
| Isoform 2 of Stabilin-1 OS=Mus muscul     | STAB1_MOUSE  | 0,50 |
| Isoform 2 of Vascular endothelial growt   | VEGFC_MOUSE  | 0,50 |
| Growth factor receptor-bound protein 2    | GRB2_MOUSE   | 0,50 |
| Proteasome subunit beta type-4 OS=M       | PSB4_MOUSE   | 0,50 |



|                                          |             |      |
|------------------------------------------|-------------|------|
| Cathepsin O OS=Mus musculus OX=100       | CATO_MOUSE  | 0,50 |
| Cysteine and glycine-rich protein 1 OS=M | CSRP1_MOUSE | 0,50 |
| Ras-related C3 botulinum toxin substrat  | RAC1_MOUSE  | 0,50 |

| Identified Proteins                                                                | Accession Number | Ratio BPM5/Ctr |
|------------------------------------------------------------------------------------|------------------|----------------|
| Isoform 2 of Fibulin-2 OS=Mus musculus OX=                                         | FBLN2_MOUSE      | 1,97           |
| Pyridoxal kinase OS=Mus musculus OX=10090                                          | PDXK_MOUSE       | 2,00           |
| 6-phosphogluconate dehydrogenase, decarboxylating OS=Mus musculus OX=10090         | 6PGD_MOUSE       | 2,00           |
| Plasminogen activator inhibitor 1 OS=Mus musculus OX=10090                         | G5E899_MOUSE     | 2,03           |
| Connective tissue growth factor OS=Mus musculus OX=10090                           | CTGF_MOUSE       | 2,06           |
| cont 004 sp K1C9_HUMAN                                                             | cont 004 sp      | 2,06           |
| Insulin-like growth factor-binding protein 4 OS=Mus musculus OX=10090              | IBP4_MOUSE       | 2,11           |
| Follistatin-related protein 1 OS=Mus musculus OX=10090                             | FSTL1_MOUSE      | 2,13           |
| Cluster of Meteorin-like protein OS=Mus musculus OX=10090                          | METRL_MOUSE      | 2,22           |
| Isoform II of Gamma-glutamyl hydrolase OS=Mus musculus OX=10090                    | GGH_MOUSE        | 2,25           |
| Beta-2-microglobulin OS=Mus musculus OX=10090                                      | B2MG_MOUSE       | 2,27           |
| Secreted frizzled-related protein 2 OS=Mus musculus OX=10090                       | SFRP2_MOUSE      | 2,33           |
| Galectin-3-binding protein OS=Mus musculus OX=10090                                | LG3BP_MOUSE      | 2,33           |
| Procollagen-lysine,2-oxoglutarate 5-dioxygenase OS=Mus musculus OX=10090           | PLOD1_MOUSE      | 2,43           |
| Carbonyl reductase [NADPH] 1 OS=Mus musculus OX=10090                              | CBR1_MOUSE       | 2,50           |
| Tripeptidyl-peptidase 1 OS=Mus musculus OX=10090                                   | TPP1_MOUSE       | 2,56           |
| Retinoid-inducible serine carboxypeptidase OS=Mus musculus OX=10090                | RISC_MOUSE       | 2,67           |
| Phosphoglycerate kinase 1 OS=Mus musculus OX=10090                                 | PGK1_MOUSE       | 2,73           |
| 72 kDa type IV collagenase OS=Mus musculus OX=10090                                | MMP2_MOUSE       | 2,73           |
| Amyloid-beta A4 protein OS=Mus musculus OX=10090                                   | A4_MOUSE         | 2,80           |
| Protein CYR61 OS=Mus musculus OX=10090                                             | CYR61_MOUSE      | 2,80           |
| Annexin A2 OS=Mus musculus OX=10090                                                | ANXA2_MOUSE      | 2,88           |
| Interleukin-18-binding protein OS=Mus musculus OX=10090                            | I18BP_MOUSE      | 3,00           |
| Cluster of Heat shock protein HSP 90-beta OS=Mus musculus OX=10090                 | HS90B_MOUSE      | 3,00           |
| Cluster of Alpha-actinin-4 OS=Mus musculus OX=10090                                | ACTN4_MOUSE      | 3,00           |
| Testin-2 OS=Mus musculus OX=10090                                                  | TEST2_MOUSE      | 3,00           |
| Poly(rC)-binding protein 1 OS=Mus musculus OX=10090                                | PCBP1_MOUSE      | 3,00           |
| Bone morphogenetic protein 1 OS=Mus musculus OX=10090                              | BMP1_MOUSE       | 3,00           |
| Cluster of Glutathione S-transferase Mu 1 OS=Mus musculus OX=10090                 | GSTM1_MOUSE      | 3,00           |
| Dihydropyrimidinase-related protein 2 OS=Mus musculus OX=10090                     | DPYL2_MOUSE      | 3,00           |
| Collagen alpha-2(IV) chain OS=Mus musculus OX=10090                                | CO4A2_MOUSE      | 3,17           |
| Glutathione S-transferase omega-1 OS=Mus musculus OX=10090                         | GSTO1_MOUSE      | 3,25           |
| Synaptic vesicle membrane protein VAT-1 homolog 1 OS=Mus musculus OX=10090         | VAT1_MOUSE       | 3,38           |
| Cadherin-11 OS=Mus musculus OX=10090                                               | CAD11_MOUSE      | 4,00           |
| Peroxidasin homolog OS=Mus musculus OX=10090                                       | PXDN_MOUSE       | 4,00           |
| Clusterin OS=Mus musculus OX=10090                                                 | CLUS_MOUSE       | 4,61           |
| Phospholipase D3 OS=Mus musculus OX=10090                                          | PLD3_MOUSE       | 4,67           |
| Endothelial protein C receptor OS=Mus musculus OX=10090                            | EPCR_MOUSE       | 5,00           |
| Isoform LAMP-2B of Lysosome-associated membrane protein 2 OS=Mus musculus OX=10090 | LAMP2_MOUSE      | 5,00           |
| Aspartate aminotransferase, cytoplasmic OS=Mus musculus OX=10090                   | AATC_MOUSE       | 5,00           |
| Thioredoxin-like protein 1 OS=Mus musculus OX=10090                                | TXNL1_MOUSE      | 5,00           |
| Isocitrate dehydrogenase [NADP] cytoplasmic OS=Mus musculus OX=10090               | IDHC_MOUSE       | 5,40           |
| Collagen alpha-1(IV) chain OS=Mus musculus OX=10090                                | CO4A1_MOUSE      | 5,50           |
| Cluster of Heat shock 70 kDa protein 4 OS=Mus musculus OX=10090                    | HSP74_MOUSE      | 6,00           |
| Phospholipid transfer protein OS=Mus musculus OX=10090                             | PLTP_MOUSE       | 6,00           |
| Fascin OS=Mus musculus OX=10090                                                    | FSCN1_MOUSE      | 7,00           |
| Carboxypeptidase Q OS=Mus musculus OX=10090                                        | CBPQ_MOUSE       | 8,00           |

|                                                                                              |              |              |
|----------------------------------------------------------------------------------------------|--------------|--------------|
| Insulin-like growth factor-binding protein 3 OS=Mus musculus OX=10090 GN=IBP3                | IBP3_MOUSE   | 8,67         |
| Inactive tyrosine-protein kinase 7 OS=Mus musculus OX=10090 GN=PTK7                          | PTK7_MOUSE   | 9,00         |
| Ribonuclease inhibitor OS=Mus musculus OX=10090 GN=RINI                                      | RINI_MOUSE   | 9,00         |
| Adipocyte enhancer-binding protein 1 OS=Mus musculus OX=10090 GN=AEBP1                       | AEBP1_MOUSE  | 9,00         |
| Collagen alpha-2(V) chain OS=Mus musculus OX=10090 GN=CO5A2                                  | CO5A2_MOUSE  | 12,50        |
| Isoform 2 of Sulfhydryl oxidase 1 OS=Mus musculus OX=10090 GN=QSOX1                          | QSOX1_MOUSE  | 12,67        |
| Cadherin-5 OS=Mus musculus OX=10090 GN=CADH5                                                 | CADH5_MOUSE  | 69,00        |
| Filamin-B OS=Mus musculus OX=10090 GN=FLNB                                                   | FLNB_MOUSE   | Only in Bmp5 |
| Endothelial cell-specific molecule 1 OS=Mus musculus OX=10090 GN=ESM1                        | ESM1_MOUSE   | Only in Bmp5 |
| Myosin light chain 3 OS=Mus musculus OX=10090 GN=MYL3                                        | MYL3_MOUSE   | Only in Bmp5 |
| Vascular cell adhesion protein 1 OS=Mus musculus OX=10090 GN=VCAM1                           | VCAM1_MOUSE  | Only in Bmp5 |
| Isoform 2 of Cell surface glycoprotein MUC18 OS=Mus musculus OX=10090 GN=MUC18               | MUC18_MOUSE  | Only in Bmp5 |
| Beta-galactosidase OS=Mus musculus OX=10090 GN=BGAL                                          | BGAL_MOUSE   | Only in Bmp5 |
| Isoform 2 of Lactadherin OS=Mus musculus OX=10090 GN=MFGM                                    | MFGM_MOUSE   | Only in Bmp5 |
| Complement component C1q receptor OS=Mus musculus OX=10090 GN=C1QR1                          | C1QR1_MOUSE  | Only in Bmp5 |
| Transitional endoplasmic reticulum ATPase OS=Mus musculus OX=10090 GN=TERA                   | TERA_MOUSE   | Only in Bmp5 |
| 60S acidic ribosomal protein P0 OS=Mus musculus OX=10090 GN=RLA0                             | RLA0_MOUSE   | Only in Bmp5 |
| Coiled-coil domain-containing protein 80 OS=Mus musculus OX=10090 GN=CCD80                   | CCD80_MOUSE  | Only in Bmp5 |
| Tyrosine-protein kinase receptor Tie-1 OS=Mus musculus OX=10090 GN=TIE1                      | TIE1_MOUSE   | Only in Bmp5 |
| Fibulin-5 OS=Mus musculus OX=10090 GN=FBLN5                                                  | FBLN5_MOUSE  | Only in Bmp5 |
| Isoform 2 of Calsyntenin-1 OS=Mus musculus OX=10090 GN=CSTN1                                 | CSTN1_MOUSE  | Only in Bmp5 |
| Phosphoserine aminotransferase OS=Mus musculus OX=10090 GN=SERC                              | SERC_MOUSE   | Only in Bmp5 |
| Plasmalemma vesicle-associated protein OS=Mus musculus OX=10090 GN=PLVAP                     | PLVAP_MOUSE  | Only in Bmp5 |
| Complement C1s-A subcomponent OS=Mus musculus OX=10090 GN=CS1A                               | CS1A_MOUSE   | Only in Bmp5 |
| Calcium-activated chloride channel regulator 1 OS=Mus musculus OX=10090 GN=CA3A1             | CA3A1_MOUSE  | Only in Bmp5 |
| Isoform 2 of Platelet endothelial cell adhesion molecule-1 OS=Mus musculus OX=10090 GN=PECA1 | PECA1_MOUSE  | Only in Bmp5 |
| Vitamin K-dependent protein S OS=Mus musculus OX=10090 GN=PROS                               | PROS_MOUSE   | Only in Bmp5 |
| 40S ribosomal protein S5 (Fragment) OS=Mus musculus OX=10090 GN=D3YYM6                       | D3YYM6_MOUSE | Only in Bmp5 |
| Cluster of H-2 class I histocompatibility antigen A-E OS=Mus musculus OX=10090 GN=HA11       | HA11_MOUSE   | Only in Bmp5 |
| Aldose reductase-related protein 2 OS=Mus musculus OX=10090 GN=ALD2                          | ALD2_MOUSE   | Only in Bmp5 |
| Isoform 3 of Programmed cell death 6-interacting protein 1 OS=Mus musculus OX=10090 GN=PDC6I | PDC6I_MOUSE  | Only in Bmp5 |
| NK13 OS=Mus musculus OX=10090 GN=O08804                                                      | O08804_MOUSE | Only in Bmp5 |
| Macrophage colony-stimulating factor 1 OS=Mus musculus OX=10090 GN=CSF1                      | CSF1_MOUSE   | Only in Bmp5 |
| Lysyl oxidase homolog 3 OS=Mus musculus OX=10090 GN=LOXL3                                    | LOXL3_MOUSE  | Only in Bmp5 |
| Spermidine synthase OS=Mus musculus OX=10090 GN=SPEE                                         | SPEE_MOUSE   | Only in Bmp5 |
| Low-density lipoprotein receptor OS=Mus musculus OX=10090 GN=LDLR                            | LDLR_MOUSE   | Only in Bmp5 |
| Selenoprotein P OS=Mus musculus OX=10090 GN=SEPP1                                            | SEPP1_MOUSE  | Only in Bmp5 |
| Isoform 2 of Heterogeneous nuclear ribonucleoprotein A/B OS=Mus musculus OX=10090 GN=ROA2    | ROA2_MOUSE   | Only in Bmp5 |
| Calumenin OS=Mus musculus OX=10090 GN=CALU                                                   | CALU_MOUSE   | Only in Bmp5 |
| Heterogeneous nuclear ribonucleoprotein A/B OS=Mus musculus OX=10090 GN=ROAA                 | ROAA_MOUSE   | Only in Bmp5 |
| Plasma protease C1 inhibitor OS=Mus musculus OX=10090 GN=IC1                                 | IC1_MOUSE    | Only in Bmp5 |
| Lysyl oxidase homolog 1 OS=Mus musculus OX=10090 GN=LOXL1                                    | LOXL1_MOUSE  | Only in Bmp5 |
| Angiotensin-converting enzyme OS=Mus musculus OX=10090 GN=ACE                                | ACE_MOUSE    | Only in Bmp5 |
| Isoform Beta of Tissue factor pathway inhibitor OS=Mus musculus OX=10090 GN=TFPI1            | TFPI1_MOUSE  | Only in Bmp5 |
| Ceroid-lipofuscinosis neuronal protein 5 homolog OS=Mus musculus OX=10090 GN=CLN5            | CLN5_MOUSE   | Only in Bmp5 |
| Macrophage colony-stimulating factor 1 receptor OS=Mus musculus OX=10090 GN=CSF1R            | CSF1R_MOUSE  | Only in Bmp5 |
| Zyxin OS=Mus musculus OX=10090 GN=ZYG                                                        | ZYG_MOUSE    | Only in Bmp5 |
| Isoform A0 of Neuropilin-2 OS=Mus musculus OX=10090 GN=NRP2                                  | NRP2_MOUSE   | Only in Bmp5 |

Angiopoietin-2 OS=Mus musculus OX=10090

ANGP2\_MOUSE

Only in Bmp5

| Identified Proteins                                                        | Accession Number | Ratio AngII/Bmp5 |
|----------------------------------------------------------------------------|------------------|------------------|
| Glia-derived nexin OS=Mus musculus                                         | GDN_MOUSE        | 2,00             |
| Endoplasmic reticulum protein OS=Mus musculus OX=1                         | ENPL_MOUSE       | 2,00             |
| Complement C1s-A subcomponent OS=Mus musculus                              | CS1A_MOUSE       | 2,00             |
| Ribonuclease inhibitor OS=Mus musculus                                     | RINI_MOUSE       | 2,00             |
| Isoform 3 of Programmed cell death 6 OS=Mus musculus                       | PDC6I_MOUSE      | 2,00             |
| Polypyrimidine tract-binding protein 1 OS=Mus musculus                     | PTBP1_MOUSE      | 2,00             |
| Chloride intracellular channel protein 4 OS=Mus musculus                   | CLIC4_MOUSE      | 2,00             |
| Angiotensin-converting enzyme OS=Mus musculus                              | ACE_MOUSE        | 2,00             |
| Heme-binding protein 1 OS=Mus musculus                                     | HEBP1_MOUSE      | 2,00             |
| Cadherin-11 OS=Mus musculus OX=10                                          | CAD11_MOUSE      | 2,00             |
| Delta-aminolevulinic acid dehydratase OS=Mus musculus                      | HEM2_MOUSE       | 2,00             |
| Isoform 2 of 4F2 cell-surface antigen 1 OS=Mus musculus                    | 4F2_MOUSE        | 2,00             |
| Four and a half LIM domains protein 3 OS=Mus musculus                      | FHL3_MOUSE       | 2,00             |
| Isoform Cytoplasmic of Glutathione reductase OS=Mus musculus               | GSHR_MOUSE       | 2,00             |
| Isoform 2 of Aly/REF export factor 2 OS=Mus musculus                       | ALRF2_MOUSE      | 2,00             |
| Receptor-type tyrosine-protein phosphatase OS=Mus musculus                 | PTPRM_MOUSE      | 2,00             |
| Monocyte differentiation antigen CD14 OS=Mus musculus                      | CD14_MOUSE       | 2,00             |
| N-acetylneuraminidase OS=Mus musculus                                      | NPL_MOUSE        | 2,00             |
| Histidine--tRNA ligase, cytoplasmic OS=Mus musculus                        | SYHC_MOUSE       | 2,00             |
| Cluster of Caldesmon 1 OS=Mus musculus                                     | E9QA16_MOUSE     | 2,00             |
| Ubiquitin thioesterase OTUB1 OS=Mus musculus                               | OTUB1_MOUSE      | 2,00             |
| 60S ribosomal protein L8 OS=Mus musculus                                   | RL8_MOUSE        | 2,00             |
| Isoform 2 of Sacsin OS=Mus musculus                                        | SACS_MOUSE       | 2,00             |
| Isoform 3 of NSFL1 cofactor p47 OS=Mus musculus                            | NSF1C_MOUSE      | 2,00             |
| Alpha-mannosidase 2 OS=Mus musculus                                        | MA2A1_MOUSE      | 2,00             |
| Growth/differentiation factor 15 OS=Mus musculus                           | GDF15_MOUSE      | 2,00             |
| Acetyl-CoA acetyltransferase, cytosolic OS=Mus musculus                    | THIC_MOUSE       | 2,00             |
| EGF-containing fibulin-like extracellular matrix protein 4 OS=Mus musculus | FBLN4_MOUSE      | 2,00             |
| 40S ribosomal protein S11 OS=Mus musculus                                  | RS11_MOUSE       | 2,00             |
| Disintegrin and metalloproteinase domain 19 OS=Mus musculus                | ADA19_MOUSE      | 2,00             |
| Cytosolic non-specific dipeptidase OS=Mus musculus                         | CNDP2_MOUSE      | 2,00             |
| Serine/threonine-protein phosphatase OS=Mus musculus                       | PP1A_MOUSE       | 2,00             |
| Trifunctional enzyme subunit beta, mitochondrial OS=Mus musculus           | ECHB_MOUSE       | 2,00             |
| Mitogen-activated protein kinase 3 OS=Mus musculus                         | MK03_MOUSE       | 2,00             |
| ADP-ribosylation factor-like protein 3 OS=Mus musculus                     | ARL3_MOUSE       | 2,00             |
| Coatomer subunit zeta-1 OS=Mus musculus                                    | COPZ1_MOUSE      | 2,00             |
| Heterogeneous nuclear ribonucleoprotein A1 OS=Mus musculus                 | ROA1_MOUSE       | 2,00             |
| 60S ribosomal protein L11 (Fragment) OS=Mus musculus                       | A2BH06_MOUSE     | 2,00             |
| Ribonuclease 4 OS=Mus musculus OX=1                                        | Q8C7E4_MOUSE     | 2,00             |
| 40S ribosomal protein S13 OS=Mus musculus                                  | RS13_MOUSE       | 2,00             |
| Isoform PDE2A1 of cGMP-dependent protein kinase 3 OS=Mus musculus          | PDE2A_MOUSE      | 2,00             |
| Dynactin subunit 3 OS=Mus musculus                                         | DCTN3_MOUSE      | 2,00             |
| Collagen triple helix repeat-containing protein 1 OS=Mus musculus          | CTHR1_MOUSE      | 2,00             |
| Calcyclin-binding protein OS=Mus musculus                                  | CYBP_MOUSE       | 2,00             |
| MOB kinase activator 1B OS=Mus musculus                                    | MOB1B_MOUSE      | 2,00             |
| N-acetyl-D-glucosamine kinase OS=Mus musculus                              | NAGK_MOUSE       | 2,00             |
| Isoform B of AP-2 complex subunit alpha OS=Mus musculus                    | AP2A1_MOUSE      | 2,00             |

|                                          |             |      |
|------------------------------------------|-------------|------|
| Nucleotide exchange factor SIL1 OS=M     | SIL1_MOUSE  | 2,00 |
| Medium-chain specific acyl-CoA dehyd     | ACADM_MOUSE | 2,00 |
| Exostosin-1 OS=Mus musculus OX=100       | EXT1_MOUSE  | 2,00 |
| PDZ and LIM domain protein 1 OS=Mu       | PDLI1_MOUSE | 2,00 |
| Isoform 2 of Intercellular adhesion m    | ICAM1_MOUSE | 2,00 |
| Ephrin-B2 OS=Mus musculus OX=1009        | EFNB2_MOUSE | 2,00 |
| Aspartyl aminopeptidase OS=Mus mu        | DNPEP_MOUSE | 2,00 |
| Synaptic vesicle membrane protein VA     | VAT1_MOUSE  | 2,04 |
| Isocitrate dehydrogenase [NADP] cyto     | IDHC_MOUSE  | 2,04 |
| Cadherin-5 OS=Mus musculus OX=100        | CADH5_MOUSE | 2,04 |
| Thioredoxin domain-containing protei     | TXND5_MOUSE | 2,08 |
| Chitinase-like protein 3 OS=Mus musc     | CHIL3_MOUSE | 2,13 |
| Complement component C1q receptor        | C1QR1_MOUSE | 2,13 |
| Cluster of Tubulin alpha-1B chain OS=    | TBA1B_MOUSE | 2,17 |
| Low-density lipoprotein receptor OS=N    | LDLR_MOUSE  | 2,17 |
| Antithrombin-III OS=Mus musculus OX      | ANT3_MOUSE  | 2,17 |
| Alcohol dehydrogenase [NADP(+)] OS=      | AK1A1_MOUSE | 2,19 |
| Insulin-like growth factor-binding prot  | IBP3_MOUSE  | 2,19 |
| Dipeptidyl peptidase 2 OS=Mus muscu      | DPP2_MOUSE  | 2,20 |
| Insulin-like growth factor-binding prot  | IBP4_MOUSE  | 2,21 |
| Pigment epithelium-derived factor OS     | PEDF_MOUSE  | 2,23 |
| Zyxin OS=Mus musculus OX=10090 GN        | ZYX_MOUSE   | 2,25 |
| Endoplasmic reticulum chaperone BiP      | BIP_MOUSE   | 2,26 |
| Cathepsin B OS=Mus musculus OX=10        | CATB_MOUSE  | 2,27 |
| Galectin-3-binding protein OS=Mus m      | LG3BP_MOUSE | 2,29 |
| Integrin beta-3 OS=Mus musculus OX=      | ITB3_MOUSE  | 2,29 |
| Endoplasmic reticulum resident protei    | ERP29_MOUSE | 2,30 |
| Multimerin-1 OS=Mus musculus OX=1        | MMRN1_MOUSE | 2,33 |
| Acid sphingomyelinase-like phosphodi     | ASM3A_MOUSE | 2,33 |
| Amyloid-beta A4 protein OS=Mus mus       | A4_MOUSE    | 2,36 |
| 60S acidic ribosomal protein P0 OS=M     | RLA0_MOUSE  | 2,38 |
| Annexin A2 OS=Mus musculus OX=100        | ANXA2_MOUSE | 2,39 |
| Serotransferrin OS=Mus musculus OX=      | TRFE_MOUSE  | 2,40 |
| Collagen alpha-2(V) chain OS=Mus m       | CO5A2_MOUSE | 2,40 |
| Glutaminyl-peptide cyclotransferase C    | QPCT_MOUSE  | 2,40 |
| Actin-related protein 2 OS=Mus muscu     | ARP2_MOUSE  | 2,40 |
| A disintegrin and metalloproteinase w    | ATS1_MOUSE  | 2,40 |
| Isoform LAMP-2B of Lysosome-associ       | LAMP2_MOUSE | 2,40 |
| Phospholipid transfer protein OS=Mus     | PLTP_MOUSE  | 2,42 |
| Isoform 2 of Fibulin-2 OS=Mus muscu      | FBLN2_MOUSE | 2,43 |
| Tripeptidyl-peptidase 1 OS=Mus musc      | TPP1_MOUSE  | 2,43 |
| Lysosomal protective protein OS=Mus      | PPGB_MOUSE  | 2,44 |
| Biglycan OS=Mus musculus OX=10090        | PGS1_MOUSE  | 2,45 |
| Cadherin-2 OS=Mus musculus OX=100        | CADH2_MOUSE | 2,45 |
| Tubulointerstitial nephritis antigen-lik | TINAL_MOUSE | 2,50 |
| Glutathione S-transferase A4 OS=Mus      | GSTA4_MOUSE | 2,50 |
| Calcium-binding protein 39 OS=Mus m      | CAB39_MOUSE | 2,50 |
| Transforming growth factor beta-2 pro    | TGFB2_MOUSE | 2,50 |



|                                         |              |      |
|-----------------------------------------|--------------|------|
| Complement C1q subcomponent subu        | C1QC_MOUSE   | 2,52 |
| Isoform C of Prelamin-A/C OS=Mus m      | LMNA_MOUSE   | 2,54 |
| Cluster of Heat shock cognate 71 kDa    | HSP7C_MOUSE  | 2,55 |
| Chloride intracellular channel protein  | CLIC1_MOUSE  | 2,57 |
| Transcobalamin-2 OS=Mus musculus        | TCO2_MOUSE   | 2,58 |
| Fibrinogen gamma chain OS=Mus mu        | FIBG_MOUSE   | 2,58 |
| Apolipoprotein E OS=Mus musculus O      | APOE_MOUSE   | 2,59 |
| Leukocyte elastase inhibitor A OS=Mu    | ILEUA_MOUSE  | 2,62 |
| 72 kDa type IV collagenase OS=Mus m     | MMP2_MOUSE   | 2,63 |
| Prolactin-2C2 OS=Mus musculus OX=1      | PR2C2_MOUSE  | 2,65 |
| Serine (Or cysteine) peptidase inhibi   | G3X8T9_MOUSE | 2,67 |
| Lymphocyte antigen 86 OS=Mus musc       | LY86_MOUSE   | 2,67 |
| Myosin-9 OS=Mus musculus OX=1009        | MYH9_MOUSE   | 2,68 |
| Gelsolin OS=Mus musculus OX=10090       | GELS_MOUSE   | 2,68 |
| cont 052 sp P99999 IRT_SYNTH Bio        | cont 052 sp  | 2,73 |
| Lamin-B1 OS=Mus musculus OX=1009        | LMNB1_MOUSE  | 2,75 |
| Transitional endoplasmic reticulum A    | TERA_MOUSE   | 2,75 |
| Lactoylglutathione lyase OS=Mus mus     | LGUL_MOUSE   | 2,75 |
| Retinoid-inducible serine carboxypepti  | RISC_MOUSE   | 2,75 |
| Isoform Beta of Tissue factor pathway   | TFPI1_MOUSE  | 2,75 |
| Carbonyl reductase [NADPH] 3 OS=Mu      | CBR3_MOUSE   | 2,75 |
| REVERSED Isoform 2 of Neuronal tyro     | NYAP1_MOUSE  | 2,75 |
| Alpha-N-acetylglucosaminidase OS=M      | O88325_MOUSE | 2,80 |
| Actin-related protein 3 OS=Mus musc     | ARP3_MOUSE   | 2,80 |
| Legumain OS=Mus musculus OX=1009        | LGMN_MOUSE   | 2,83 |
| Peptidyl-prolyl cis-trans isomerase A   | PPIA_MOUSE   | 2,83 |
| Cystatin-C OS=Mus musculus OX=1009      | CYTC_MOUSE   | 2,83 |
| Dipeptidyl peptidase 1 OS=Mus muscu     | CATC_MOUSE   | 2,83 |
| Cofilin-1 OS=Mus musculus OX=10090      | COF1_MOUSE   | 2,85 |
| Carboxypeptidase E OS=Mus musculus      | CBPE_MOUSE   | 2,86 |
| Serpin H1 OS=Mus musculus OX=1009       | SERPH_MOUSE  | 2,86 |
| Procollagen C-endopeptidase enhance     | PCOC1_MOUSE  | 2,87 |
| Cluster of Alpha-enolase OS=Mus mus     | ENOA_MOUSE   | 2,87 |
| Cluster of Actin, cytoplasmic 1 OS=Mu   | ACTB_MOUSE   | 2,89 |
| Fibrinogen beta chain OS=Mus muscu      | FIBB_MOUSE   | 2,89 |
| Filamin-A OS=Mus musculus OX=1009       | FLNA_MOUSE   | 2,90 |
| Platelet-activating factor acetylhydrol | PAFA_MOUSE   | 2,91 |
| L-lactate dehydrogenase A chain OS=N    | LDHA_MOUSE   | 2,95 |
| Collagen alpha-1(IV) chain OS=Mus m     | CO4A1_MOUSE  | 2,95 |
| 40S ribosomal protein SA OS=Mus mu      | RSSA_MOUSE   | 3,00 |
| Thioredoxin-dependent peroxide reduc    | PRDX3_MOUSE  | 3,00 |
| Aspartate aminotransferase, cytoplas    | AATC_MOUSE   | 3,00 |
| Pre-mRNA-processing-splicing factor     | PRP8_MOUSE   | 3,00 |
| NADH dehydrogenase [ubiquinone] fla     | NDUV2_MOUSE  | 3,00 |
| Aldose reductase-related protein 2 OS   | ALD2_MOUSE   | 3,00 |
| GrpE protein homolog 1, mitochondria    | GRPE1_MOUSE  | 3,00 |
| Dolichyl-diphosphooligosaccharide--pr   | OST48_MOUSE  | 3,00 |
| 26S proteasome non-ATPase regulato      | PSMD2_MOUSE  | 3,00 |

|                                         |              |      |
|-----------------------------------------|--------------|------|
| Ubiquitin carboxyl-terminal hydrolase   | UCHL1_MOUSE  | 3,00 |
| Heat shock 70 kDa protein 13 OS=Mus     | HSP13_MOUSE  | 3,00 |
| Phospholipase B-like 1 OS=Mus muscu     | PLBL1_MOUSE  | 3,00 |
| Isoform 2 of Cellular nucleic acid-bind | CNBP_MOUSE   | 3,00 |
| 60S ribosomal protein L17 OS=Mus m      | RL17_MOUSE   | 3,00 |
| Phosphoserine phosphatase OS=Mus r      | SERB_MOUSE   | 3,00 |
| Lysyl oxidase homolog 2 OS=Mus mus      | LOXL2_MOUSE  | 3,00 |
| Isoform Alpha-6X1A of Integrin alpha-   | ITA6_MOUSE   | 3,00 |
| Isoform 2 of Elongation factor 1-delta  | EF1D_MOUSE   | 3,00 |
| Myozenin-2 OS=Mus musculus OX=10        | MYOZ2_MOUSE  | 3,00 |
| GTP-binding protein SAR1b OS=Mus n      | SAR1B_MOUSE  | 3,00 |
| Translin OS=Mus musculus OX=10090       | TSN_MOUSE    | 3,00 |
| Myomesin 2 OS=Mus musculus OX=10        | Q14BI5_MOUSE | 3,00 |
| Nectin-2 OS=Mus musculus OX=10090       | NECT2_MOUSE  | 3,00 |
| Oligoribonuclease, mitochondrial OS=    | ORN_MOUSE    | 3,00 |
| 60S ribosomal protein L15 OS=Mus m      | RL15_MOUSE   | 3,00 |
| 26S proteasome non-ATPase regulato      | PSMD9_MOUSE  | 3,00 |
| Ras-related protein Rab-5C OS=Mus n     | RAB5C_MOUSE  | 3,00 |
| Arginine--tRNA ligase, cytoplasmic OS   | SYRC_MOUSE   | 3,00 |
| Disintegrin and metalloproteinase dor   | ADA10_MOUSE  | 3,00 |
| CCR4-NOT transcription complex subu     | CNOT9_MOUSE  | 3,00 |
| N(G),N(G)-dimethylarginine dimethyla    | DDAH2_MOUSE  | 3,00 |
| Pyruvate dehydrogenase E1 componer      | ODPB_MOUSE   | 3,00 |
| Isoform Cytoplasmic of Fumarate hyd     | FUMH_MOUSE   | 3,00 |
| Isoform 2 of Mannan-binding lectin se   | MASP1_MOUSE  | 3,00 |
| Isoform 2 of Protein CDV3 OS=Mus m      | CDV3_MOUSE   | 3,00 |
| Tolloid-like protein 1 OS=Mus muscul    | TLL1_MOUSE   | 3,00 |
| Cytochrome c oxidase subunit 2 OS=M     | COX2_MOUSE   | 3,00 |
| E3 ubiquitin-protein ligase NEDD4 OS=   | NEDD4_MOUSE  | 3,00 |
| Serine/threonine-protein phosphatase    | PP2AA_MOUSE  | 3,00 |
| Isoform 2 of 2-oxoglutarate dehydroge   | ODO1_MOUSE   | 3,00 |
| Adapter molecule crk OS=Mus muscul      | CRK_MOUSE    | 3,00 |
| Isoform 2 of UTP--glucose-1-phosphat    | UGPA_MOUSE   | 3,00 |
| Isoform 2 of Hydroxyacylglutathione h   | GLO2_MOUSE   | 3,00 |
| 60S ribosomal protein L21 OS=Mus m      | RL21_MOUSE   | 3,00 |
| Neuropilin-1 OS=Mus musculus OX=10      | NRP1_MOUSE   | 3,00 |
| Caveolae-associated protein 1 OS=Mu     | CAVN1_MOUSE  | 3,00 |
| Isoform B of Heat shock protein beta-   | HSPB1_MOUSE  | 3,00 |
| Calponin-2 OS=Mus musculus OX=100       | CNN2_MOUSE   | 3,00 |
| Proliferating cell nuclear antigen OS=  | PCNA_MOUSE   | 3,00 |
| Cluster of Ras-related protein Rab-2A   | RAB2A_MOUSE  | 3,00 |
| Isoform 2 of Small glutamine-rich tetr  | SGTA_MOUSE   | 3,00 |
| Glycerol-3-phosphate phosphatase OS     | PGP_MOUSE    | 3,00 |
| Rho-related GTP-binding protein RhoG    | RHOG_MOUSE   | 3,00 |
| Isoform 2 of Sarcoplasmic/endoplasm     | AT2A2_MOUSE  | 3,00 |
| Angiopoietin-2 OS=Mus musculus OX=      | ANGP2_MOUSE  | 3,02 |
| Flavin reductase (NADPH) OS=Mus m       | BLVRB_MOUSE  | 3,07 |
| Integrin alpha-IIb OS=Mus musculus C    | ITA2B_MOUSE  | 3,11 |

|                                          |             |      |
|------------------------------------------|-------------|------|
| Malate dehydrogenase, mitochondrial      | MDHM_MOUSE  | 3,11 |
| Cluster of Insulin-like growth factor-bi | IBP7_MOUSE  | 3,14 |
| Isoform 2 of 14-3-3 protein theta OS=    | 1433T_MOUSE | 3,15 |
| Adipocyte enhancer-binding protein 1     | AEBP1_MOUSE | 3,17 |
| Syntenin-1 OS=Mus musculus OX=100        | SDCB1_MOUSE | 3,17 |
| Aldose reductase OS=Mus musculus C       | ALDR_MOUSE  | 3,17 |
| Complement C1q subcomponent subu         | C1QB_MOUSE  | 3,18 |
| 6-phosphogluconate dehydrogenase, c      | 6PGD_MOUSE  | 3,20 |
| Macrophage colony-stimulating factor     | CSF1_MOUSE  | 3,20 |
| Lysyl oxidase homolog 3 OS=Mus mus       | LOXL3_MOUSE | 3,20 |
| Nucleobindin-1 OS=Mus musculus OX=       | NUCB1_MOUSE | 3,21 |
| Fructose-bisphosphate aldolase A OS=     | ALDOA_MOUSE | 3,23 |
| Glutathione S-transferase omega-1 O      | GSTO1_MOUSE | 3,23 |
| Nidogen-1 OS=Mus musculus OX=100         | NID1_MOUSE  | 3,24 |
| Collagen alpha-2(IV) chain OS=Mus m      | CO4A2_MOUSE | 3,25 |
| Cluster of 14-3-3 protein gamma OS=      | 1433G_MOUSE | 3,25 |
| Renin receptor OS=Mus musculus OX=       | REN1_MOUSE  | 3,25 |
| N-acetylgalactosamine-6-sulfatase OS     | GALNS_MOUSE | 3,25 |
| Collagen alpha-2(I) chain OS=Mus mu      | CO1A2_MOUSE | 3,26 |
| Isoform 2 of MICOS complex subunit N     | MIC60_MOUSE | 3,33 |
| Metalloproteinase inhibitor 1 OS=Mus     | TIMP1_MOUSE | 3,35 |
| Proteasome subunit beta type-1 OS=N      | PSB1_MOUSE  | 3,38 |
| Fibulin-5 OS=Mus musculus OX=10090       | FBLN5_MOUSE | 3,38 |
| Elongation factor 1-gamma OS=Mus r       | EF1G_MOUSE  | 3,38 |
| Lipoprotein lipase OS=Mus musculus C     | LIPL_MOUSE  | 3,39 |
| Isoform 2 of Adenylate kinase 2, mito    | KAD2_MOUSE  | 3,40 |
| Integrin beta-1 OS=Mus musculus OX=      | ITB1_MOUSE  | 3,43 |
| Plasmalemma vesicle-associated prot      | PLVAP_MOUSE | 3,43 |
| Cluster of Collagen alpha-1(XVIII) chai  | CO1A1_MOUSE | 3,44 |
| Palmitoyl-protein thioesterase 1 OS=N    | PPT1_MOUSE  | 3,44 |
| 14-3-3 protein eta OS=Mus musculus       | 1433F_MOUSE | 3,46 |
| Complement C1q subcomponent subu         | C1QA_MOUSE  | 3,48 |
| Testin-2 OS=Mus musculus OX=10090        | TEST2_MOUSE | 3,50 |
| Platelet glycoprotein Ib beta chain OS=  | GP1BB_MOUSE | 3,50 |
| Malate dehydrogenase, cytoplasmic O      | MDHC_MOUSE  | 3,50 |
| Isoform 2 of Sorcin OS=Mus musculus      | SORCN_MOUSE | 3,50 |
| Protein SEC13 homolog OS=Mus musc        | SEC13_MOUSE | 3,50 |
| Protein disulfide-isomerase A4 OS=M      | PDIA4_MOUSE | 3,50 |
| Beta-1,3-N-acetylglucosaminyltransfe     | LFNG_MOUSE  | 3,50 |
| Platelet-activating factor acetylhydrol  | PA1B2_MOUSE | 3,50 |
| 26S proteasome non-ATPase regulato       | PSD13_MOUSE | 3,50 |
| Cathepsin L1 OS=Mus musculus OX=10       | CATL1_MOUSE | 3,52 |
| Nucleoside diphosphate kinase B OS=      | NDKB_MOUSE  | 3,52 |
| Triosephosphate isomerase OS=Mus r       | TPIS_MOUSE  | 3,55 |
| Poly(rC)-binding protein 1 OS=Mus mu     | PCBP1_MOUSE | 3,56 |
| Collagen alpha-1(I) chain OS=Mus mu      | CO1A1_MOUSE | 3,57 |
| Proteasome subunit beta type-5 OS=N      | PSB5_MOUSE  | 3,60 |
| Proteasome subunit alpha type-3 OS=      | PSA3_MOUSE  | 3,60 |

|                                         |              |      |
|-----------------------------------------|--------------|------|
| 60S ribosomal protein L12 OS=Mus m      | RL12_MOUSE   | 3,60 |
| Biliverdin reductase A OS=Mus muscu     | BIEA_MOUSE   | 3,60 |
| Thioredoxin-like protein 1 OS=Mus mu    | TXNL1_MOUSE  | 3,60 |
| Glutathione S-transferase P 1 OS=Mus    | GSTP1_MOUSE  | 3,63 |
| Peroxiredoxin-2 OS=Mus musculus OX      | PRDX2_MOUSE  | 3,64 |
| Protein CYR61 OS=Mus musculus OX=       | CYR61_MOUSE  | 3,64 |
| Lysosomal alpha-mannosidase OS=Mu       | MA2B1_MOUSE  | 3,65 |
| Osteopontin OS=Mus musculus OX=10       | OSTP_MOUSE   | 3,67 |
| Rho GDP-dissociation inhibitor 2 OS=N   | GDIR2_MOUSE  | 3,67 |
| Follistatin-related protein 3 OS=Mus r  | FSTL3_MOUSE  | 3,67 |
| Fibrinogen alpha chain OS=Mus muscu     | FIBA_MOUSE   | 3,68 |
| Bone morphogenetic protein 1 OS=Mu      | BMP1_MOUSE   | 3,75 |
| Selenoprotein P OS=Mus musculus OX      | SEPP1_MOUSE  | 3,75 |
| 14-3-3 protein epsilon OS=Mus muscu     | 1433E_MOUSE  | 3,77 |
| Carbonic anhydrase 1 OS=Mus muscul      | CAH1_MOUSE   | 3,81 |
| Metalloproteinase inhibitor 2 OS=Mus    | Q6PI17_MOUSE | 3,85 |
| Glucose-6-phosphate isomerase OS=N      | G6PI_MOUSE   | 3,86 |
| Proteasome subunit alpha type-1 OS=     | PSA1_MOUSE   | 3,89 |
| Cluster of Glutathione S-transferase N  | GSTM1_MOUSE  | 3,92 |
| Peroxiredoxin-1 OS=Mus musculus OX      | PRDX1_MOUSE  | 3,92 |
| Cluster of Phosphoglycerate mutase 1    | PGAM1_MOUSE  | 3,94 |
| Transgelin-2 OS=Mus musculus OX=10      | TAGL2_MOUSE  | 3,98 |
| Coatomer subunit beta' OS=Mus muscu     | COPB2_MOUSE  | 4,00 |
| Isoform CNPI of 2',3'-cyclic-nucleotide | CN37_MOUSE   | 4,00 |
| Actin-related protein 2/3 complex sub   | ARPC5_MOUSE  | 4,00 |
| Proteasome subunit alpha type-2 OS=     | PSA2_MOUSE   | 4,00 |
| Isoform VEGF-1 of Vascular endotheli    | VEGFA_MOUSE  | 4,00 |
| Enoyl-CoA delta isomerase 1, mitoch     | ECI1_MOUSE   | 4,00 |
| Apolipoprotein A-I OS=Mus musculus      | APOA1_MOUSE  | 4,00 |
| Ubiquitin-like modifier-activating enzy | UBA1_MOUSE   | 4,00 |
| Vasodilator-stimulated phosphoprotei    | VASP_MOUSE   | 4,00 |
| Collagen alpha-2(VI) chain OS=Mus m     | CO6A2_MOUSE  | 4,00 |
| 60S ribosomal protein L13a OS=Mus n     | RL13A_MOUSE  | 4,00 |
| Citrate synthase, mitochondrial OS=M    | CISY_MOUSE   | 4,00 |
| Ubiquitin-fold modifier-conjugating er  | UFC1_MOUSE   | 4,00 |
| Collectin-12 OS=Mus musculus OX=10      | COL12_MOUSE  | 4,00 |
| Cytochrome c oxidase subunit 4 isofor   | COX41_MOUSE  | 4,00 |
| Gamma-aminobutyric acid receptor-a      | GBRAP_MOUSE  | 4,00 |
| Inhibin beta B chain OS=Mus musculu     | INHBB_MOUSE  | 4,00 |
| Macrophage mannose receptor 1 OS=       | MRC1_MOUSE   | 4,00 |
| S-methyl-5'-thioadenosine phosphoryl    | MTAP_MOUSE   | 4,00 |
| UV excision repair protein RAD23 hom    | RD23B_MOUSE  | 4,00 |
| Isoform 2 of Neural cell adhesion mol   | NCAM1_MOUSE  | 4,00 |
| Calreticulin OS=Mus musculus OX=100     | CALR_MOUSE   | 4,00 |
| Matrix remodeling-associated protein    | MXRA8_MOUSE  | 4,00 |
| ATP synthase subunit gamma, mitoch      | ATPG_MOUSE   | 4,00 |
| SPARC-like protein 1 OS=Mus musculu     | SPRL1_MOUSE  | 4,00 |
| Obg-like ATPase 1 OS=Mus musculus       | OLA1_MOUSE   | 4,00 |

|                                         |                  |      |
|-----------------------------------------|------------------|------|
| 26S proteasome non-ATPase regulato      | PSDE_MOUSE       | 4,00 |
| Cluster of Fibronectin OS=Mus muscul    | A0A087WR50_MOUSE | 4,01 |
| F-actin-capping protein subunit alpha-  | CAZA1_MOUSE      | 4,17 |
| Ganglioside GM2 activator OS=Mus m      | SAP3_MOUSE       | 4,22 |
| Isoform 2 of Immunoglobulin heavy co    | IGHM_MOUSE       | 4,25 |
| Ribonuclease T2-A OS=Mus musculus       | RNT2A_MOUSE      | 4,29 |
| Connective tissue growth factor OS=M    | CTGF_MOUSE       | 4,32 |
| Protein disulfide-isomerase OS=Mus r    | PDIA1_MOUSE      | 4,36 |
| S-formylglutathione hydrolase OS=M      | H3BKH6_MOUSE     | 4,40 |
| Transaldolase OS=Mus musculus OX=       | TALDO_MOUSE      | 4,42 |
| Carbonic anhydrase 2 OS=Mus muscul      | CAH2_MOUSE       | 4,44 |
| Cluster of Thrombospondin-1 OS=Mus      | Q80YQ1_MOUSE     | 4,48 |
| EMILIN-1 OS=Mus musculus OX=1009        | EMIL1_MOUSE      | 4,50 |
| Isoform IGF-IB of Insulin-like growth f | IGF1_MOUSE       | 4,50 |
| Ear6 protein OS=Mus musculus OX=10      | Q923L7_MOUSE     | 4,50 |
| Germinal-center associated nuclear p    | GANP_MOUSE       | 4,50 |
| 14-3-3 protein zeta/delta OS=Mus mu     | 1433Z_MOUSE      | 4,58 |
| Vitamin K-dependent protein S OS=M      | PROS_MOUSE       | 4,60 |
| 40S ribosomal protein S5 (Fragment)     | D3YYM6_MOUSE     | 4,60 |
| N(4)-(beta-N-acetylglucosaminy)-L-as    | ASPG_MOUSE       | 4,67 |
| Filamin-B OS=Mus musculus OX=1009       | FLNB_MOUSE       | 4,68 |
| Calcium-activated chloride channel reg  | CA3A1_MOUSE      | 4,80 |
| Proteasome subunit alpha type-5 OS=     | PSA5_MOUSE       | 4,83 |
| Dihydrolipoyllysine-residue succinyltra | ODO2_MOUSE       | 5,00 |
| Integrin alpha-5 OS=Mus musculus OX     | ITA5_MOUSE       | 5,00 |
| Immunoglobulin superfamily member       | IGSF8_MOUSE      | 5,00 |
| Thioredoxin domain-containing protei    | TXD12_MOUSE      | 5,00 |
| Arginine-rich, mutated in early stage t | Q3TMX5_MOUSE     | 5,00 |
| H-2 class I histocompatibility antigen, | G3UXW2_MOUSE     | 5,00 |
| Heterogeneous nuclear ribonucleoprot    | ROAA_MOUSE       | 5,00 |
| Complement C1q tumor necrosis facto     | C1QT5_MOUSE      | 5,00 |
| Isoform 2 of Heterogeneous nuclear ri   | HNRPD_MOUSE      | 5,00 |
| Isoform 2 of Acyl-protein thioesterase  | LYPA1_MOUSE      | 5,00 |
| Extracellular sulfatase Sulf-2 OS=Mus   | SULF2_MOUSE      | 5,00 |
| Inorganic pyrophosphatase OS=Mus m      | IPYR_MOUSE       | 5,00 |
| Isoform 2 of Poly(rC)-binding protein 2 | PCBP2_MOUSE      | 5,00 |
| Isoamyl acetate-hydrolyzing esterase    | IAH1_MOUSE       | 5,00 |
| NPC intracellular cholesterol transport | NPC2_MOUSE       | 5,19 |
| Proteasome subunit beta type-6 OS=N     | PSB6_MOUSE       | 5,25 |
| Isoform 2 of Sorbin and SH3 domain-c    | SRBS2_MOUSE      | 5,25 |
| Isoform 2 of Heterogeneous nuclear ri   | ROA2_MOUSE       | 5,33 |
| Annexin A1 OS=Mus musculus OX=100       | ANXA1_MOUSE      | 5,36 |
| Isoform 2 of Tenascin OS=Mus muscu      | TENA_MOUSE       | 5,37 |
| Cluster of Isoform 2 of Tropomyosin a   | TPM3_MOUSE       | 5,40 |
| Cluster of Tubulin beta-5 chain OS=M    | TBB5_MOUSE       | 5,41 |
| Beta-glucuronidase OS=Mus musculus      | BGLR_MOUSE       | 5,48 |
| Annexin A5 OS=Mus musculus OX=100       | ANXA5_MOUSE      | 5,50 |
| Isoform 2 of Proliferation-associated p | PA2G4_MOUSE      | 5,50 |

|                                                                                     |              |      |
|-------------------------------------------------------------------------------------|--------------|------|
| Ephrin-A1 OS=Mus musculus OX=10090                                                  | EFNA1_MOUSE  | 5,50 |
| Acid ceramidase OS=Mus musculus OX=10090                                            | ASAH1_MOUSE  | 5,60 |
| 26S proteasome non-ATPase regulatory subunit 8 OS=Mus musculus OX=10090             | PSMD8_MOUSE  | 5,67 |
| 40S ribosomal protein S4, X isoform OS=Mus musculus OX=10090                        | RS4X_MOUSE   | 5,67 |
| V-type proton ATPase subunit S1 OS=Mus musculus OX=10090                            | VAS1_MOUSE   | 5,70 |
| Talin-1 OS=Mus musculus OX=10090                                                    | TLN1_MOUSE   | 5,73 |
| F-actin-capping protein subunit alpha-1 OS=Mus musculus OX=10090                    | CAZA2_MOUSE  | 5,75 |
| Serpin B6 OS=Mus musculus OX=10090                                                  | SPB6_MOUSE   | 5,87 |
| Ferritin OS=Mus musculus OX=10090                                                   | Q9CPX4_MOUSE | 5,88 |
| Collagen alpha-1(V) chain OS=Mus musculus OX=10090                                  | CO5A1_MOUSE  | 5,88 |
| Malectin OS=Mus musculus OX=10090                                                   | MLEC_MOUSE   | 6,00 |
| Isoform 2 of Calsyntenin-1 OS=Mus musculus OX=10090                                 | CSTN1_MOUSE  | 6,00 |
| Calpain small subunit 1 OS=Mus musculus OX=10090                                    | CPNS1_MOUSE  | 6,00 |
| Ras GTPase-activating-like protein IQGAP1 OS=Mus musculus OX=10090                  | IQGA1_MOUSE  | 6,00 |
| Hydroxyacyl-coenzyme A dehydrogenase OS=Mus musculus OX=10090                       | HCDH_MOUSE   | 6,00 |
| Decorin OS=Mus musculus OX=10090                                                    | PGS2_MOUSE   | 6,00 |
| Spermidine synthase OS=Mus musculus OX=10090                                        | SPEE_MOUSE   | 6,00 |
| Cluster of ADP-ribosylation factor 1 OS=Mus musculus OX=10090                       | ARF1_MOUSE   | 6,00 |
| Dihydropteridine reductase OS=Mus musculus OX=10090                                 | DHPR_MOUSE   | 6,00 |
| Isoform 2 of Stabilin-1 OS=Mus musculus OX=10090                                    | STAB1_MOUSE  | 6,00 |
| Isoform 2 of Vascular endothelial growth factor receptor 1 OS=Mus musculus OX=10090 | VEGFC_MOUSE  | 6,00 |
| Elongation factor 1-beta OS=Mus musculus OX=10090                                   | EF1B_MOUSE   | 6,00 |
| Isoform 2 of Amyloid-like protein 2 OS=Mus musculus OX=10090                        | APLP2_MOUSE  | 6,00 |
| LIM and SH3 domain protein 1 OS=Mus musculus OX=10090                               | LASP1_MOUSE  | 6,00 |
| Serine protease 23 OS=Mus musculus OX=10090                                         | PRS23_MOUSE  | 6,00 |
| Semaphorin-3A OS=Mus musculus OX=10090                                              | SEM3A_MOUSE  | 6,00 |
| Creatine kinase B-type OS=Mus musculus OX=10090                                     | KCRB_MOUSE   | 6,00 |
| Beta-1,4-galactosyltransferase 5 OS=Mus musculus OX=10090                           | B4GT5_MOUSE  | 6,00 |
| Stromelysin-3 OS=Mus musculus OX=10090                                              | MMP11_MOUSE  | 6,00 |
| Ferritin heavy chain OS=Mus musculus OX=10090                                       | FRIH_MOUSE   | 6,20 |
| Bisphosphoglycerate mutase OS=Mus musculus OX=10090                                 | PMGE_MOUSE   | 6,20 |
| Isoform 2 of Platelet endothelial cell adhesion molecule-1 OS=Mus musculus OX=10090 | PECA1_MOUSE  | 6,25 |
| Arylsulfatase A OS=Mus musculus OX=10090                                            | ARSA_MOUSE   | 6,33 |
| Ubiquitin-60S ribosomal protein L40 OS=Mus musculus OX=10090                        | RL40_MOUSE   | 6,38 |
| Collagen alpha-1(III) chain OS=Mus musculus OX=10090                                | CO3A1_MOUSE  | 6,38 |
| Moesin OS=Mus musculus OX=10090                                                     | MOES_MOUSE   | 6,40 |
| Proteasome subunit alpha type-7 OS=Mus musculus OX=10090                            | PSA7_MOUSE   | 6,40 |
| 6-phosphogluconolactonase OS=Mus musculus OX=10090                                  | 6PGL_MOUSE   | 6,50 |
| Deoxyribonuclease-2-alpha OS=Mus musculus OX=10090                                  | DNS2A_MOUSE  | 6,50 |
| Growth factor receptor-bound protein 2 OS=Mus musculus OX=10090                     | GRB2_MOUSE   | 6,50 |
| Eukaryotic initiation factor 4A-I OS=Mus musculus OX=10090                          | IF4A1_MOUSE  | 6,50 |
| Aspartate aminotransferase, mitochondrial OS=Mus musculus OX=10090                  | AATM_MOUSE   | 6,57 |
| Vimentin OS=Mus musculus OX=10090                                                   | VIME_MOUSE   | 6,63 |
| Thrombospondin-2 OS=Mus musculus OX=10090                                           | TSP2_MOUSE   | 6,67 |
| Dihydropyrimidinase-related protein 2 OS=Mus musculus OX=10090                      | DPYL2_MOUSE  | 6,67 |
| Complement C3 OS=Mus musculus OX=10090                                              | CO3_MOUSE    | 7,00 |
| Receptor of activated protein C kinase 1 OS=Mus musculus OX=10090                   | RACK1_MOUSE  | 7,00 |
| Protein/nucleic acid deglycase DJ-1 OS=Mus musculus OX=10090                        | PARK7_MOUSE  | 7,00 |

|                                         |              |      |
|-----------------------------------------|--------------|------|
| Proteasome subunit beta type-2 OS=M     | PSB2_MOUSE   | 7,00 |
| ELAV-like protein 1 OS=Mus musculus     | ELAV1_MOUSE  | 7,00 |
| Actin-related protein 2/3 complex sub   | ARPC4_MOUSE  | 7,00 |
| Isoform 2 of Spectrin alpha chain, non  | SPTN1_MOUSE  | 7,00 |
| Mesothelin OS=Mus musculus OX=100       | MSLN_MOUSE   | 7,00 |
| Isoform 1 of Core histone macro-H2A.    | H2AY_MOUSE   | 7,00 |
| IST1 homolog OS=Mus musculus OX=1       | IST1_MOUSE   | 7,00 |
| Coatomer subunit delta OS=Mus musc      | COPD_MOUSE   | 7,00 |
| Inosine triphosphate pyrophosphatase    | ITPA_MOUSE   | 7,00 |
| Pyridoxal phosphate homeostasis prot    | PLPHP_MOUSE  | 7,00 |
| Cluster of Glyceraldehyde-3-phosphate   | G3P_MOUSE    | 7,09 |
| Peptidyl-prolyl cis-trans isomerase B C | PPIB_MOUSE   | 7,13 |
| Cathepsin S OS=Mus musculus OX=10       | CATS_MOUSE   | 7,15 |
| Protein CREG1 OS=Mus musculus OX=       | CREG1_MOUSE  | 7,25 |
| Phosphoserine aminotransferase OS=      | SERC_MOUSE   | 7,25 |
| Rab GDP dissociation inhibitor beta O   | GDIB_MOUSE   | 7,29 |
| Collagen alpha-1(VI) chain OS=Mus m     | CO6A1_MOUSE  | 7,40 |
| Transgelin OS=Mus musculus OX=100       | TAGL_MOUSE   | 7,50 |
| L-lactate dehydrogenase B chain OS=N    | LDHB_MOUSE   | 7,50 |
| Transketolase OS=Mus musculus OX=       | TKT_MOUSE    | 7,60 |
| von Willebrand factor OS=Mus muscu      | VWF_MOUSE    | 7,93 |
| Protein-glutamine gamma-glutamyltr      | TGM2_MOUSE   | 8,00 |
| Phosphatidylethanolamine-binding pro    | PEBP1_MOUSE  | 8,00 |
| Heme oxygenase 1 OS=Mus musculus        | HMOX1_MOUSE  | 8,00 |
| Proteasome subunit beta type-3 OS=N     | PSB3_MOUSE   | 8,00 |
| Neuronal pentraxin-1 OS=Mus muscul      | NPTX1_MOUSE  | 8,00 |
| Actin-related protein 2/3 complex sub   | ARC1B_MOUSE  | 8,00 |
| Electron transfer flavoprotein subunit  | ETFA_MOUSE   | 8,00 |
| Proteasome subunit beta type-8 OS=N     | PSB8_MOUSE   | 8,00 |
| Hypoxia up-regulated protein 1 OS=M     | HYOU1_MOUSE  | 8,00 |
| Cluster of Isoform 2 of Heterogeneous   | HNRPF_MOUSE  | 8,00 |
| Farnesyl pyrophosphate synthase OS=     | FPPS_MOUSE   | 8,00 |
| Myristoylated alanine-rich C-kinase su  | MARCS_MOUSE  | 8,00 |
| Isocitrate dehydrogenase [NADP], mit    | IDHP_MOUSE   | 8,00 |
| Purine nucleoside phosphorylase OS=N    | PNPH_MOUSE   | 8,20 |
| Peroxiredoxin-6 OS=Mus musculus OX      | PRDX6_MOUSE  | 8,36 |
| Isoform 2 of F-actin-capping protein s  | CAPZB_MOUSE  | 8,40 |
| Isoform Short of Collagen alpha-1(XI)   | COBA1_MOUSE  | 8,50 |
| GTP-binding nuclear protein Ran OS=N    | RAN_MOUSE    | 8,50 |
| Collagen, type VI, alpha 3 OS=Mus mu    | E9PWQ3_MOUSE | 9,00 |
| Isoform Short of Latent-transforming    | LTBP1_MOUSE  | 9,00 |
| Proteasome subunit beta type-4 OS=N     | PSB4_MOUSE   | 9,00 |
| UMP-CMP kinase OS=Mus musculus C        | KCY_MOUSE    | 9,00 |
| 40S ribosomal protein S8 OS=Mus mu      | RS8_MOUSE    | 9,00 |
| Electron transfer flavoprotein subunit  | ETFB_MOUSE   | 9,00 |
| Cathepsin O OS=Mus musculus OX=10       | CATO_MOUSE   | 9,00 |
| Olfactomedin-like protein 2B OS=Mus     | OLM2B_MOUSE  | 9,00 |
| Vascular endothelial growth factor rec  | VGFR1_MOUSE  | 9,00 |



|                                         |              |       |
|-----------------------------------------|--------------|-------|
| Isoform 2 of Multimerin-2 OS=Mus m      | MMRN2_MOUSE  | 9,00  |
| Isoform 2 of Septin-11 OS=Mus muscu     | SEP11_MOUSE  | 9,00  |
| Matrix metalloproteinase-19 OS=Mus      | MMP19_MOUSE  | 9,00  |
| Cluster of Elongation factor 1-alpha 1  | EF1A1_MOUSE  | 9,13  |
| Lysosomal acid lipase/cholesteryl este  | LICH_MOUSE   | 9,50  |
| Fascin OS=Mus musculus OX=10090 G       | FSCN1_MOUSE  | 9,57  |
| Inositol monophosphatase 1 OS=Mus       | IMPA1_MOUSE  | 10,00 |
| Superoxide dismutase [Mn], mitochor     | SODM_MOUSE   | 10,00 |
| Ras suppressor protein 1 OS=Mus mus     | RSU1_MOUSE   | 10,00 |
| Angiopoietin-related protein 2 OS=M     | ANGL2_MOUSE  | 10,00 |
| Dextrin OS=Mus musculus OX=10090 G      | DEST_MOUSE   | 10,00 |
| Laminin subunit gamma-1 OS=Mus m        | F8VQJ3_MOUSE | 10,00 |
| Ras-related protein Rab-7a OS=Mus m     | RAB7A_MOUSE  | 10,00 |
| Adenosylhomocysteinase OS=Mus mu        | SAHH_MOUSE   | 10,00 |
| Coronin-1C OS=Mus musculus OX=100       | COR1C_MOUSE  | 10,00 |
| Trifunctional enzyme subunit alpha, m   | ECHA_MOUSE   | 10,00 |
| Cell division control protein 42 homolo | CDC42_MOUSE  | 10,00 |
| Mammalian ependymin-related prote       | EPDR1_MOUSE  | 10,00 |
| Ubiquitin-conjugating enzyme E2 K OS    | UBE2K_MOUSE  | 10,00 |
| Keratin, type I cytoskeletal 16 OS=Mus  | K1C16_MOUSE  | 10,00 |
| Peptidyl-prolyl cis-trans isomerase C C | PPIC_MOUSE   | 10,18 |
| Rho GDP-dissociation inhibitor 1 OS=N   | GDIR1_MOUSE  | 10,33 |
| Cluster of Pyruvate kinase PKM OS=M     | KPYM_MOUSE   | 10,46 |
| NK13 OS=Mus musculus OX=10090 G         | O08804_MOUSE | 10,67 |
| Dihydrolipoyl dehydrogenase, mitocho    | DLDH_MOUSE   | 11,00 |
| Glutathione peroxidase 3 OS=Mus mu      | GPX3_MOUSE   | 11,00 |
| Protein-lysine 6-oxidase OS=Mus mus     | LYOX_MOUSE   | 11,00 |
| Ribosomal protein OS=Mus musculus       | Q5XJF6_MOUSE | 11,00 |
| Proteasome subunit beta type-7 OS=N     | PSB7_MOUSE   | 11,00 |
| Troponin I, cardiac muscle OS=Mus m     | TNNI3_MOUSE  | 11,00 |
| Collagen alpha-1(XV) chain OS=Mus m     | COFA1_MOUSE  | 11,00 |
| Phosphatidylinositol transfer protein a | PIPNA_MOUSE  | 11,00 |
| Isoform 2 of Cytosol aminopeptidase C   | AMPL_MOUSE   | 11,00 |
| Isoform 2 of Vacuolar protein sorting-  | VPS29_MOUSE  | 11,00 |
| Urokinase-type plasminogen activator    | UROK_MOUSE   | 11,27 |
| Putative phospholipase B-like 2 OS=M    | PLBL2_MOUSE  | 11,33 |
| Gamma-interferon-inducible lysosoma     | GILT_MOUSE   | 11,50 |
| Proteasome subunit alpha type-6 OS=     | PSA6_MOUSE   | 11,67 |
| C-C motif chemokine 2 OS=Mus muscu      | CCL2_MOUSE   | 12,00 |
| Cluster of Ras-related protein Rab-1B   | RAB1B_MOUSE  | 12,00 |
| WD repeat-containing protein 1 OS=M     | WDR1_MOUSE   | 12,00 |
| Isoform A3B of Troponin T, cardiac m    | TNNT2_MOUSE  | 12,00 |
| Laminin subunit alpha-4 OS=Mus mus      | LAMA4_MOUSE  | 12,00 |
| Myoglobin OS=Mus musculus OX=100        | MYG_MOUSE    | 12,00 |
| Serine protease HTRA1 OS=Mus muscu      | HTRA1_MOUSE  | 12,00 |
| Dihydropyrimidinase-related protein 3   | E9PWE8_MOUSE | 12,67 |
| Proteasome subunit alpha type-4 OS=     | PSA4_MOUSE   | 13,00 |
| PDZ and LIM domain protein 5 OS=M       | PDLI5_MOUSE  | 13,00 |

|                                          |                  |               |
|------------------------------------------|------------------|---------------|
| 60S ribosomal protein L7 OS=Mus mu       | RL7_MOUSE        | 13,00         |
| 40S ribosomal protein S3a OS=Mus m       | RS3A_MOUSE       | 13,00         |
| Aconitate hydratase, mitochondrial OS    | ACON_MOUSE       | 13,00         |
| Isoform 2 of Neutral alpha-glucosidas    | GANAB_MOUSE      | 13,00         |
| Microtubule-associated protein RP/EB     | MARE1_MOUSE      | 13,00         |
| Isoform PLEC-1I of Plectin OS=Mus m      | PLEC_MOUSE       | 14,00         |
| Ras-related protein Rab-11B OS=Mus       | RB11B_MOUSE      | 14,00         |
| Prolow-density lipoprotein receptor-re   | LRP1_MOUSE       | 14,00         |
| Macrophage metalloelastase OS=Mus        | MMP12_MOUSE      | 14,33         |
| Adenylyl cyclase-associated protein 1    | CAP1_MOUSE       | 14,67         |
| Peroxidasin homolog OS=Mus musculi       | PXDN_MOUSE       | 14,88         |
| Translationally-controlled tumor prote   | TCTP_MOUSE       | 15,00         |
| Protein CTLA-2-alpha OS=Mus musculi      | CTL2A_MOUSE      | 15,00         |
| ATP synthase subunit O, mitochondria     | ATPO_MOUSE       | 15,00         |
| Eukaryotic translation initiation factor | IF5A1_MOUSE      | 15,00         |
| Nidogen-2 OS=Mus musculus OX=100         | NID2_MOUSE       | 15,00         |
| Vesicular integral-membrane protein      | LMAN2_MOUSE      | 16,00         |
| Semaphorin-7A OS=Mus musculus OX         | SEM7A_MOUSE      | 16,00         |
| Glucosamine-6-phosphate isomerase        | GNPI1_MOUSE      | 16,00         |
| Laminin subunit beta-1 OS=Mus musc       | LAMB1_MOUSE      | 16,00         |
| Basement membrane-specific hepara        | E9PZ16_MOUSE     | 16,71         |
| Tropomodulin-3 OS=Mus musculus OX        | TMOD3_MOUSE      | 17,00         |
| 60 kDa heat shock protein, mitochon      | CH60_MOUSE       | 17,00         |
| 40S ribosomal protein S3 OS=Mus mu       | RS3_MOUSE        | 17,00         |
| Actin-related protein 2/3 complex sub    | ARPC3_MOUSE      | 18,00         |
| Desmin OS=Mus musculus OX=10090          | DESM_MOUSE       | 18,00         |
| Protein FAM3C OS=Mus musculus OX=        | FAM3C_MOUSE      | 19,00         |
| Elongation factor 2 OS=Mus musculus      | EF2_MOUSE        | 19,33         |
| Titin OS=Mus musculus OX=10090 GN        | TITIN_MOUSE      | 20,00         |
| Actin-related protein 2/3 complex sub    | ARPC2_MOUSE      | 20,50         |
| ATP synthase subunit beta, mitochon      | ATPB_MOUSE       | 20,57         |
| Epididymis-specific alpha-mannosidas     | MA2B2_MOUSE      | 21,00         |
| Fibrillin-1 OS=Mus musculus OX=1009      | FBN1_MOUSE       | 21,25         |
| Glypican-4 OS=Mus musculus OX=100        | GPC4_MOUSE       | 22,00         |
| 40S ribosomal protein S2 OS=Mus mu       | RS2_MOUSE        | 23,00         |
| Myosin regulatory light chain 2, ventri  | MLRV_MOUSE       | 26,00         |
| Cysteine and glycine-rich protein 1 OS   | CSRP1_MOUSE      | 29,00         |
| Ras-related C3 botulinum toxin substr    | RAC1_MOUSE       | 29,00         |
| Myosin light chain 3 OS=Mus musculi      | MYL3_MOUSE       | 34,00         |
| Cluster of Tropomyosin alpha-1 chain     | TPM1_MOUSE       | 59,00         |
| ATP synthase subunit alpha, mitochon     | ATPA_MOUSE       | 131,00        |
| Myosin-6 OS=Mus musculus OX=1009         | MYH6_MOUSE       | Only in AngII |
| Angiopietin-1 OS=Mus musculus OX=        | ANGP1_MOUSE      | Only in AngII |
| Cluster of Ras-related protein Rap-1b    | RAP1B_MOUSE      | Only in AngII |
| Cluster of Myosin-binding protein C, ca  | E9Q9T8_MOUSE     | Only in AngII |
| Creatine kinase M-type OS=Mus musc       | KCRM_MOUSE       | Only in AngII |
| Sepiapterin reductase OS=Mus muscu       | SPRE_MOUSE       | Only in AngII |
| Beta-mannosidase OS=Mus musculus         | AOA0R4J092_MOUSE | Only in AngII |

|                                         |              |               |
|-----------------------------------------|--------------|---------------|
| Delta(3,5)-Delta(2,4)-dienoyl-CoA isom  | ECH1_MOUSE   | Only in AngII |
| Pro-cathepsin H OS=Mus musculus OX      | CATH_MOUSE   | Only in AngII |
| 60S ribosomal protein L18 OS=Mus m      | RL18_MOUSE   | Only in AngII |
| 60S ribosomal protein L5 OS=Mus mu      | RL5_MOUSE    | Only in AngII |
| T-complex protein 1 subunit eta OS=M    | TCPH_MOUSE   | Only in AngII |
| 3-ketoacyl-CoA thiolase, mitochondria   | THIM_MOUSE   | Only in AngII |
| Isoform Mt-VDAC1 of Voltage-depend      | VDAC1_MOUSE  | Only in AngII |
| Spectrin beta chain, non-erythrocytic 1 | SPTB2_MOUSE  | Only in AngII |
| 60S ribosomal protein L6 OS=Mus mu      | RL6_MOUSE    | Only in AngII |
| Cytochrome c oxidase subunit 5A, mito   | COX5A_MOUSE  | Only in AngII |
| Mannosyl-oligosaccharide 1,2-alpha-m    | MA1A1_MOUSE  | Only in AngII |
| Isoform 2 of Disintegrin and metallopr  | ADA15_MOUSE  | Only in AngII |
| Isoform Cytoplasmic+peroxisomal of F    | PRDX5_MOUSE  | Only in AngII |
| Isoform 2 of Heterogeneous nuclear ri   | HNRPU_MOUSE  | Only in AngII |
| Isoform Short of H-2 class II histocom  | HG2A_MOUSE   | Only in AngII |
| Tartrate-resistant acid phosphatase ty  | PPA5_MOUSE   | Only in AngII |
| Fibroblast growth factor 2 OS=Mus m     | FGF2_MOUSE   | Only in AngII |
| Peptidyl-prolyl cis-trans isomerase FK  | FKB10_MOUSE  | Only in AngII |
| BTB/POZ domain-containing protein K     | KCD12_MOUSE  | Only in AngII |
| NAD(P) transhydrogenase, mitochondr     | NNTM_MOUSE   | Only in AngII |
| Proprotein convertase subtilisin/kexin  | PCSK9_MOUSE  | Only in AngII |
| Proteasome activator complex subunit    | PSME1_MOUSE  | Only in AngII |
| 60S ribosomal protein L14 OS=Mus m      | RL14_MOUSE   | Only in AngII |
| 60S ribosomal protein L7a OS=Mus m      | RL7A_MOUSE   | Only in AngII |
| Isoform 2 of AP-2 complex subunit bet   | AP2B1_MOUSE  | Only in AngII |
| Metalloproteinase inhibitor 3 OS=Mus    | TIMP3_MOUSE  | Only in AngII |
| Cytoskeleton-associated protein 4 OS=   | CKAP4_MOUSE  | Only in AngII |
| Glutamate dehydrogenase 1, mitocho      | DHE3_MOUSE   | Only in AngII |
| Protein FAM49B OS=Mus musculus OX       | FA49B_MOUSE  | Only in AngII |
| Latent-transforming growth factor bet   | LTBP2_MOUSE  | Only in AngII |
| 60S ribosomal protein L18a OS=Mus n     | RL18A_MOUSE  | Only in AngII |
| 40S ribosomal protein S18 OS=Mus m      | RS18_MOUSE   | Only in AngII |
| Twinfilin-1 OS=Mus musculus OX=100      | TWF1_MOUSE   | Only in AngII |
| 60S ribosomal protein L9 OS=Mus mu      | RL9_MOUSE    | Only in AngII |
| Cluster of Ubiquitin-conjugating enzym  | UB2V1_MOUSE  | Only in AngII |
| ATP synthase subunit delta, mitochon    | ATPD_MOUSE   | Only in AngII |
| Clathrin heavy chain 1 OS=Mus muscu     | CLH1_MOUSE   | Only in AngII |
| Glutathione peroxidase 1 OS=Mus mu      | GPX1_MOUSE   | Only in AngII |
| Inhibin beta A chain OS=Mus musculu     | INHBA_MOUSE  | Only in AngII |
| Stromelysin-1 OS=Mus musculus OX=       | MMP3_MOUSE   | Only in AngII |
| Osteoclast-stimulating factor 1 OS=M    | OSTF1_MOUSE  | Only in AngII |
| Phosphatidylinositol transfer protein b | PIPNB_MOUSE  | Only in AngII |
| 60S ribosomal protein L13 OS=Mus m      | RL13_MOUSE   | Only in AngII |
| Acetyl-CoA acetyltransferase, mitoch    | THIL_MOUSE   | Only in AngII |
| Nuclease-sensitive element-binding p    | YBOX1_MOUSE  | Only in AngII |
| Synaptobrevin homolog YKT6 OS=Mus       | YKT6_MOUSE   | Only in AngII |
| AHNAK nucleoprotein (desmoyokin) O      | E9Q616_MOUSE | Only in AngII |
| Isoform Smooth muscle of Myosin lig     | MYL6_MOUSE   | Only in AngII |

|                                        |             |               |
|----------------------------------------|-------------|---------------|
| COP9 signalosome complex subunit 8     | CSN8_MOUSE  | Only in AngII |
| Tyrosine-protein kinase Mer OS=Mus     | MERTK_MOUSE | Only in AngII |
| 40S ribosomal protein S7 OS=Mus mu     | RS7_MOUSE   | Only in AngII |
| T-complex protein 1 subunit zeta OS=   | TCPZ_MOUSE  | Only in AngII |
| Isoform 2 of Matrilin-2 OS=Mus musc    | MATN2_MOUSE | Only in AngII |
| [Protein ADP-ribosylarginine] hydrolas | ADPRH_MOUSE | Only in AngII |
| C-X-C motif chemokine 16 OS=Mus m      | CXL16_MOUSE | Only in AngII |
| Major prion protein OS=Mus musculus    | PRIO_MOUSE  | Only in AngII |
| Cluster of Isoform 2 of Microtubule-as | MAP4_MOUSE  | Only in AngII |
| Fatty acid synthase OS=Mus musculus    | FAS_MOUSE   | Only in AngII |
| Hypoxanthine-guanine phosphoribosyl    | HPRT_MOUSE  | Only in AngII |
| Isopentenyl-diphosphate Delta-isomer   | IDI1_MOUSE  | Only in AngII |
| Integral membrane protein 2B OS=M      | ITM2B_MOUSE | Only in AngII |
| Proteasome activator complex subunit   | PSME2_MOUSE | Only in AngII |
| Cytochrome b-c1 complex subunit 2, m   | QCR2_MOUSE  | Only in AngII |
| Ubiquitin-conjugating enzyme E2 L3 O   | UB2L3_MOUSE | Only in AngII |
| Isoform 2 of Thioredoxin reductase 1,  | TRXR1_MOUSE | Only in AngII |
| Voltage-dependent anion-selective ch   | VDAC2_MOUSE | Only in AngII |
| Cluster of ADP/ATP translocase 1 OS=   | ADT1_MOUSE  | Only in AngII |
| ATP synthase subunit d, mitochondrial  | ATP5H_MOUSE | Only in AngII |
| Mannose-1-phosphate guanyltransfera    | GMPPB_MOUSE | Only in AngII |
| Peroxiredoxin-4 OS=Mus musculus OX     | PRDX4_MOUSE | Only in AngII |
| Cytochrome b-c1 complex subunit 1, m   | QCR1_MOUSE  | Only in AngII |
| Alpha-soluble NSF attachment proteir   | SNAA_MOUSE  | Only in AngII |
| Syntaxin-7 OS=Mus musculus OX=100      | STX7_MOUSE  | Only in AngII |
| Fibulin-1 OS=Mus musculus OX=10090     | FBLN1_MOUSE | Only in AngII |
| PDZ and LIM domain protein 7 OS=M      | PDLI7_MOUSE | Only in AngII |
| Calcium-regulated heat stable protein  | CHSP1_MOUSE | Only in AngII |
| Latexin OS=Mus musculus OX=10090       | LXN_MOUSE   | Only in AngII |
| 26S proteasome non-ATPase regulato     | PSD11_MOUSE | Only in AngII |
| T-complex protein 1 subunit beta OS=   | TCPB_MOUSE  | Only in AngII |
| Vesicle-associated membrane protein    | VAPA_MOUSE  | Only in AngII |
| Isoform 3 of Soluble calcium-activated | CANT1_MOUSE | Only in AngII |
| Isoform 2 of Adenylate kinase isoenzy  | KAD1_MOUSE  | Only in AngII |
| UDP-N-acetylhexosamine pyrophosph      | UAP1L_MOUSE | Only in AngII |
| N(G),N(G)-dimethylarginine dimethyla   | DDAH1_MOUSE | Only in AngII |
| Endothelial cell-selective adhesion m  | ESAM_MOUSE  | Only in AngII |
| Lysosome-associated membrane glyco     | LAMP1_MOUSE | Only in AngII |
| Profilin-1 OS=Mus musculus OX=1009     | PROF1_MOUSE | Only in AngII |
| RNA-binding protein 3 OS=Mus muscu     | RBM3_MOUSE  | Only in AngII |
| Vacuolar protein sorting-associated pr | VPS35_MOUSE | Only in AngII |
| Catalase OS=Mus musculus OX=10090      | CATA_MOUSE  | Only in AngII |
| Xaa-Pro dipeptidase OS=Mus musculu     | PEPD_MOUSE  | Only in AngII |
